1  
2  
3  
4  
5  
6  
7  
8  
9  
10  
11  
12  
13  
14  
15  
16  
17  
18  
19  
20  
21  
22  
23  
24  
25  
26  
27  
28  
29  
30  
31  
32  
33  
34  
35  
36  
37  
38  
39  
40  
41  
42  
43  
44  
45  
46  
47

## Early adversity changes the economic conditions of structural brain network organisation

Sofia Carozza<sup>1\*</sup>, Joni Holmes<sup>1,2</sup>, Petra E. Vértes<sup>3</sup>, Ed Bullmore<sup>3,4</sup>, Tanzil M. Arefin<sup>5</sup>, Alexa Pugliese<sup>6</sup>, Jiangyang Zhang<sup>5</sup>, Arie Kaffman<sup>6</sup>, Danyal Akarca<sup>1</sup>, Duncan E. Astle<sup>1</sup>

<sup>1</sup> MRC Cognition and Brain Sciences Unit, University of Cambridge, Cambridge, UK

<sup>2</sup> School of Psychology, University of East Anglia, Norwich, UK

<sup>3</sup> Department of Psychiatry, University of Cambridge, Cambridge, UK

<sup>4</sup> Department of Clinical Neurosciences, Wolfson Brain Imaging Centre, University of Cambridge, Cambridge, UK

<sup>5</sup> Bernard and Irene Schwartz Center for Biomedical Imaging, Department of Radiology, New York University School of Medicine, New York, NY 10016, USA.

<sup>6</sup> Department of Psychiatry, Yale University School of Medicine, 300 George Street, Suite 901, New Haven CT, 06511, USA.

\* Corresponding author: Sofia Carozza

Email: [sofia.carozza@mrc-cbu.cam.ac.uk](mailto:sofia.carozza@mrc-cbu.cam.ac.uk)

Address: 15 Chaucer Road Cambridge CB2 7EF UK

Telephone: +44 1223 355294

**Classification:** Biological sciences; Neuroscience

**Keywords:** Early adversity, generative models, structural connectome, graph theory

48 **Abstract**

49 Early adversity can change educational, cognitive, and mental health outcomes. However,  
50 the neural processes through which early adversity exerts these effects remain largely  
51 unknown. We used generative network modelling of the mouse connectome to test  
52 whether unpredictable postnatal stress shifts the constraints that govern the formation of  
53 the structural connectome. A model that trades off the wiring cost of long-distance  
54 connections with topological homophily (i.e. links between regions with shared neighbours)  
55 generated simulations that replicate the organisation of the rodent connectome. The  
56 imposition of early life adversity significantly shifted the best-performing parameter  
57 combinations toward zero, heightening the stochastic nature of the generative process. Put  
58 simply, unpredictable postnatal stress changes the economic constraints that shape  
59 network formation, introducing greater randomness into the structural development of the  
60 brain. While this change may constrain the development of cognitive abilities, it could also  
61 reflect an adaptive mechanism. In other words, neural development could harness  
62 heightened stochasticity to make networks more robust to perturbation, thereby facilitating  
63 effective responses to future threats and challenges.

64

65 **Significance statement**

66 Children who experience adversity early in life – such as chronic poverty or abuse – show  
67 numerous neural differences that are linked to poorer cognition and mental health later in  
68 life. To effectively mitigate the burden of adversity, it is critical to identify how these  
69 differences arise. In this paper, we use computational modelling to test whether growing up  
70 in an impoverished and unpredictable environment changes the development of structural  
71 connections in the mouse brain. We found that early adversity appears to introduce more  
72 stochasticity in the formation of neural architecture. Our findings point to a potential  
73 mechanism for how early adversity could change the course of child development.

74

75

76

77

78

79

80

81

82

83

84

85

86

87

88

89

90

91

92

93

94

95 **Introduction**

96 The structure of the human brain undergoes complex changes over the first three decades  
97 of life<sup>1</sup>. At the macroscopic level, neural development proceeds through the formation of a  
98 network of white-matter projections between populations of neurons, a process both  
99 subject to genetic control and environmental regulation<sup>2-4</sup>. A complete wiring map of the  
100 brain, known as a “connectome”, can be reconstructed through diffusion-weighted  
101 magnetic resonance imaging (MRI) and analysed using graph theory<sup>5</sup>. Healthy neural  
102 architecture is characterised by a precise pattern of organisation, or topology, that emerges  
103 over the course of childhood<sup>6,7</sup>. For instance, brain networks exhibit small-worldness, a  
104 balance between a short average path length and high clustering that permits both  
105 integrated and segregated processing of information<sup>8,9</sup>. Features of connectome  
106 organisation can predict developmental differences across individuals, including variation in  
107 cognitive ability and mental health<sup>10,11</sup>.

108  
109 The structural organisation of the brain emerges amid a tight set of constraints. The most  
110 significant of these is the biophysical embedding of the network, because of which long-  
111 distance connections incur a large metabolic cost<sup>12</sup>. The brain has adapted to limit this cost  
112 by making parsimonious use of energy and space, creating comparatively expensive features  
113 – such as connections between spatially distant regions – judiciously<sup>9,13</sup>. But cost  
114 minimisation alone cannot account for the observed organisation of biological neural  
115 networks<sup>14,15</sup>. Rather, the brain appears to negotiate an economic trade-off between the  
116 physical cost of structural connections and the topological value they add to the  
117 network<sup>9,16,17</sup>. Recent advances in computational modelling offer a way to directly  
118 investigate the constraints that govern the development of the connectome by generating  
119 networks using different wiring rules<sup>14,16,18-20</sup>. Studies employing this approach have shown  
120 that slight manipulations in the trade-off between two key generative model terms - wiring  
121 cost and topological value - can reproduce real-world diversity in structural brain  
122 organisation, and account for differences in behavioural phenotypes<sup>16,21,22</sup>. However, we do  
123 not yet know which developmental factors, including social environmental conditions in  
124 early life, modulate the wiring economy and thus shape the trajectory of brain network  
125 development.

126  
127 The quality of the early environment is a critical determinant of neurodevelopment<sup>23</sup>.  
128 Children who experience adversity or maltreatment show subtle differences in the  
129 organisation of their connectomes, including lower connectivity between modules and  
130 altered centrality of regions such as the amygdala<sup>24,25</sup>. Such neural differences may be  
131 conducive to navigating a hostile and unpredictable early environment, but may come at  
132 the expense of poorer cognition and mental health later in life<sup>26</sup>. Due to the methodological  
133 and ethical limits of human research, experimental studies in rodent models have proven  
134 invaluable for establishing the causal role of adversity in neural outcomes<sup>27</sup>. Recent work in  
135 mice has shown that early-life stress causes local changes in brain network organisation,  
136 including an increase in frontolimbic connectivity and decrease in efficiency of the  
137 amygdala, that drive a global increase in small-worldness and heightened anxiety-related  
138 behaviour<sup>28,29</sup>. The increasingly thorough demonstration of adversity-related differences in  
139 brain structure highlights a crucial mechanistic gap in our understanding: how does early  
140 adversity alter the development of network-level brain organisation?

141

142 In the current study we test whether early adversity alters the wiring economy of the  
143 developing mouse connectome using a paradigm of unpredictable postnatal stress (UPS).  
144 UPS pups are raised under conditions of limited bedding to mimic impoverishment and are  
145 also exposed to unpredictable hour-long bouts of maternal separation and nest disruption  
146 to model chaotic and complex adversity<sup>28,30</sup>. We reconstructed the structural connectomes  
147 of 49 adult mice, half of which were exposed to UPS during the first four weeks of life<sup>30</sup>.  
148 Using generative network modelling, we computationally simulated realistic networks for  
149 each animal and evaluated how well they replicated the observed connectomes. We then  
150 tested for differences in the economic conditions of brain development by comparing the  
151 generative model parameters that most closely replicated the connectomes of each group.  
152 Finally, we explored the developmental implications of shifts in the wiring economy of the  
153 brain.

## 154 Results

### 156 Empirical connectomes

157 At birth, N = 49 pups were randomly assigned to a control or UPS<sup>30</sup> condition (**Figure 1a**).  
158 Mice were kept in rearing conditions until adolescence and sacrificed in adulthood, at which  
159 point diffusion imaging was performed (see Methods). Using probabilistic tractography, we  
160 reconstructed binary structural connectomes for each mouse. The connectomes showed no  
161 differences between groups on gross measures of global topology, including on number of  
162 edges ( $p = 0.89$ ), number of long-distance connections ( $p = 0.52$ ), maximum modularity ( $p =$   
163  $0.72$ ), global efficiency ( $p = 0.71$ ), or small-worldness ( $p = 0.47$ ) (see **Methods**;  
164 **Supplementary Table S1**). Groups did not differ on the distributions of key local  
165 characteristics, including node degree, clustering coefficient, betweenness centrality, edge  
166 length, mean matching index, and nodal efficiency (all  $p > 0.96$ ) (see **Methods**;  
167 **Supplementary Table S2**).

### 169 Generative modelling procedure

170 To simulate the formation of each connectome, we formalised a trade-off between two  
171 competing factors: the wiring cost incurred by new connections and the topological value  
172 they add to the network<sup>16,21</sup>. The cost term penalises long-distance connections, thereby  
173 capturing the evolutionarily conserved drive to minimise the metabolic and material  
174 expense of axonal projections<sup>9,18</sup>. The value term favours connections between regions that  
175 share some topological property, such as a similar pattern of clustering or a large number of  
176 existing connections<sup>7,9,18</sup>.

177  
178 The model simulates connectome formation by incrementally adding connections, one at a  
179 time, from some initial conditions. At each step, it estimates the likelihood of potential new  
180 structural connections using a simple probability equation<sup>16,21</sup>:

$$181 \quad P_{i,j} \propto (D_{i,j})^\eta (K_{i,j})^\gamma \quad (1)$$

182  
183 where  $P_{i,j}$  is the probability of forming a binary connection between any two previously  
184 unconnected regions of the brain,  $i$  and  $j$ . The first term  $D_{i,j}$  represents the wiring cost. As  
185 the resources required by an axonal projection increase with its length<sup>9</sup>,  $D_{i,j}$  approximates  
186 the cost of a connection using the Euclidean distance between the brain regions it would  
187 connect. The term is scaled by a parameter  $\eta$ , which determines the strength of its  
188

189 contribution to the overall wiring probability. To penalise longer distance connections,  $\eta$  is  
 190 negative.

191  
 192 The second term  $K_{i,j}$  represents the topological value of a connection and can take  
 193 numerous forms. Following previous work<sup>16,21,22</sup>, we tested thirteen variations of  $K$  (known  
 194 as “generative rules”), each one quantifying a different topological relationship between the  
 195 two nodes  $i$  and  $j$ . The generative rules we considered fall in three categories: (i) homophily  
 196 models, which favour connections between nodes with similar connectivity  
 197 neighbourhoods; (ii) clustering-based models, which utilise the clustering coefficients of the  
 198 regions; and (ii) degree-based models, which utilise their node degree.  $K_{i,j}$  is scaled by a  
 199 parameter  $\gamma$ , which is positive to favour connections with a higher topological value.  
 200

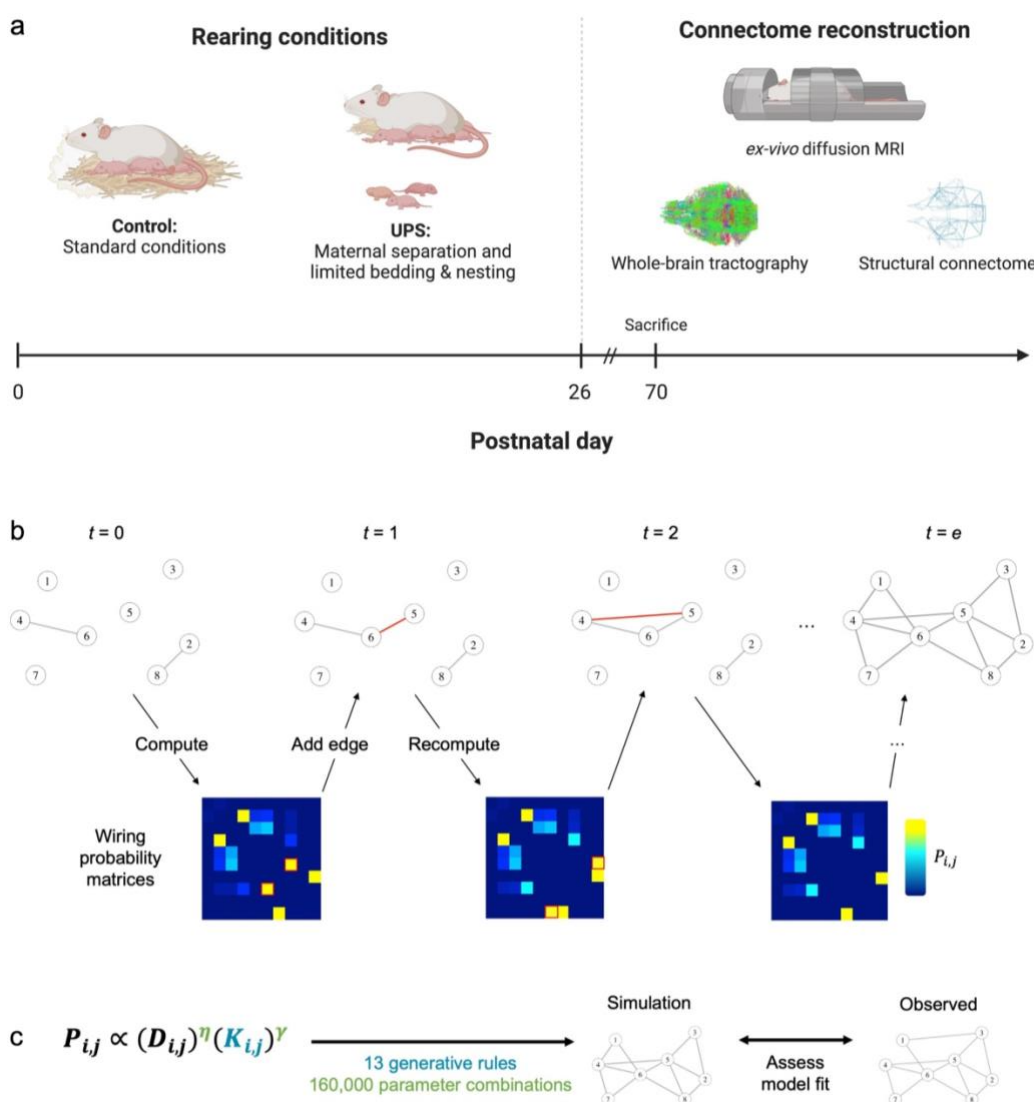

201  
 202 **Figure 1. Experimental design and generative modelling procedure.** (a) On postnatal day 0,  $N = 49$   
 203 pups were randomly assigned to a paradigm of unpredictable postnatal stress or standard rearing  
 204 conditions until postnatal day 26. After postnatal day 70, mice were sacrificed and ex-vivo diffusion  
 205 imaging was performed. Whole-brain probabilistic tractography was used to reconstruct the  
 206 structural connectome of each animal. (b) An illustration of the generative process using a simplified  
 207 connectome of ten nodes. Starting from a sparse seed network ( $t = 0$ ), edges are added one at a time  
 208 until the simulation reaches the number of edges found in the observed connectome ( $t = e$ ). The

209 *matrix of wiring probabilities is updated at each step, allowing for dynamic shifts as the topology of*  
210 *the network emerges. (c) By systematically varying generative rules and parameter combinations, it*  
211 *is possible to identify the topological term  $K$  and the parameters  $\eta$  and  $\gamma$  that best simulate the*  
212 *organisation of the observed connectome.*

213  
214 At every step of the generative process, the model multiplies the cost and value terms for  
215 each pair of regions to produce a matrix of relative wiring probabilities, and probabilistically  
216 chooses a “winning” edge to add to the simulation (**Figure 1b**). Given that every new  
217 connection changes the topology of the network, and therefore also the  $K_{i,j}$  term for some  
218 possible connections, the model iteratively updates  $P_{i,j}$  over time. In other words, the  
219 model continually re-computes the probability of future connections.

220  
221 Shifts in wiring probability can occur quite rapidly, especially whilst the connectome is  
222 sparse<sup>22</sup>. For example, consider the network at step  $t = 0$  in **Figure 1b**. Suppose it is growing  
223 according to a generative rule that favours connections between regions with shared  
224 neighbours. According to the probability function (Eq. 1), nodes 4 and 5 would be unlikely to  
225 wire together at first, because they are relatively distant and share no neighbours. Instead,  
226 at step  $t = 1$ , a connection forms between proximal nodes 5 and 6. However, this new  
227 connection gives nodes 4 and 5 a shared neighbour and therefore increases the topological  
228 value of forming a direct connection, which occurs at step  $t = 2$ , despite the greater distance  
229 between them. Whilst wiring cost remains the same across development, the topological  
230 value of connections, and therefore the overall wiring probability, is dynamic from one step  
231 to the next. As the network grows, longer connections become increasingly likely as the  
232 topological value added by new links outweighs the penalisation of wiring cost<sup>31</sup>.

233  
234 The generative process terminates when the synthetic network reaches the number of  
235 edges of the connectome that the model is simulating. By varying the generative rule used  
236 as the topological term  $K_{i,j}$ , and the  $\eta$  and  $\gamma$  parameters, it is possible to systematically  
237 manipulate the conditions that govern the development of the synthetic network (**Figure**  
238 **1c**). Identifying the rules and parameters that best simulate the real connectomes of  
239 individuals can thus shed light on what may be guiding their structural  
240 neurodevelopment<sup>18,21,22</sup>.

241  
242 **Homophily-based simulations achieve best model fit**

243 We first sought to identify the generative rule that most successfully reproduced the  
244 structural connectomes of our sample of mice ( $N = 49$ ). For each animal and generative rule,  
245 we tested 160,000 parameter combinations evenly distributed throughout the space  
246 defined by  $-10 \leq \eta \leq 0$  and  $0 \leq \gamma \leq 10$ . Beginning with a sparse seed network of edges  
247 shared across all animals (see **Methods; Supplementary Figure S1**), connections were added  
248 according to the probability function (Eq. 1) until the synthetic network reached the number  
249 of edges of the empirical connectome of that animal.

250  
251 At the end of the generative process, we assessed how well each synthetic network fit the  
252 connectome it was simulating using the following energy equation<sup>21</sup>:

253  
254 
$$E = \max(KS_k, KS_c, KS_b, KS_d) \quad (2)$$

255



256 where the terms are the Kolmogorov-Smirnov (KS) statistics comparing the synthetic and  
257 empirical distributions of node degree ( $k$ ), clustering coefficient ( $c$ ), betweenness centrality  
258 ( $b$ ), and edge length ( $d$ ). These four measures are critical properties of networks that are  
259 linked to stress exposure and psychiatric conditions<sup>32,33</sup> and have previously been used to  
260 assess the similarity of empirical and economically simulated connectomes<sup>21,22,34</sup>. As the  
261 energy is the maximum of the four statistics, a lower energy corresponds to better model  
262 fit. In other words, Eq. 2 compares the organisation of each synthetic network to the  
263 organisation of the biological connectome; if the networks are similarly organised, then the  
264 energy will be low.

265  
266 To assess the performance of the models, we compared the lowest-energy simulation  
267 produced by each rule. All generative rules outperformed a purely spatial model that  
268 considered only wiring cost (**Figure 2a**; **Supplementary Table S3**). An ANOVA and post-hoc  
269 Tukey test confirmed that models specifying homophily as the topological  $K_{i,j}$  term  
270 achieved lower energy than those utilising clustering ( $diff = -0.090$ ,  $p = 1.97 \times 10^{-12}$ ) or  
271 degree ( $diff = -0.020$ ,  $p = 1.16 \times 10^{-9}$ ). Thus, generative models that trade-off the wiring cost  
272 of a connection with a measure of neighbourhood similarity produce synthetic networks  
273 whose global topological distributions closely resemble those of the observed connectomes.  
274 As multiple models achieved low energy, the success of the top-performing models from  
275 each category was examined further.

### 276 277 **Homophily best recapitulates the local properties of observed networks**

278 The energy equation effectively assesses how closely the statistical distributions of nodal  
279 characteristics of the synthetic networks resemble those of the empirical connectomes.  
280 However, brain networks also exhibit local patterns of relationships between nodal  
281 characteristics. For instance, nodes with high betweenness centrality tend to be lower in  
282 clustering, given their position between modules<sup>35</sup>.

283  
284 To address this, we characterised the local organisational properties of the empirical and  
285 simulated networks using a method called the “topological fingerprint,” which has recently  
286 been developed for this purpose<sup>31</sup>. First, we selected the lowest-energy simulations  
287 produced by each generative rule. We then calculated six common measures of nodal  
288 topology, including degree, betweenness centrality, clustering coefficient, edge length, local  
289 efficiency, and mean matching index. Next, we computed correlations between these  
290 measures, calculated the sample average, and summarised the results in a 6-by-6 matrix.  
291 These matrices are called topological fingerprints because they summarise the unique  
292 patterns of local organisation found across a network.

293  
294 Topological fingerprints (TF) for the empirical connectomes and the top-performing  
295 generative models from each category can be found in **Figure 2b** (all other rules are shown  
296 in **Supplementary Figure S2a**). A visual comparison of the topological fingerprints offers a  
297 way of estimating how well the generative models replicate the local properties of the  
298 connectomes. To formalise this assessment quantitatively, we also calculated the difference  
299 in their topological fingerprints, ( $\Delta TF$ ) according to the following equation<sup>31</sup>, which  
300 implements the Euclidean norm:

$$301 \quad \Delta TF_{i,j} = \sqrt{\sum_i \sum_j \left( TF_{empirical_{i,j}} - TF_{synthetic_{i,j}} \right)^2} \quad (3)$$

302 The homophily model achieved the lowest  $\Delta TF$ , confirming the visual impression that its  
 303 topological fingerprint was most similar to that of the empirical connectomes (**Figure 2c**;  
 304 comparable results are shown for all other rules in **Supplementary Figure 2b**). In other  
 305 words, a model that balances the cost of an additional connection against the number of  
 306 shared neighbours produces networks with local patterns of organisation that closely  
 307 resemble those of the rodent connectome, even though local topology was not explicitly  
 308 optimised by the energy function.

309  
 310 **Figure 2. Relative performance of generative network models in replicating the organisation of**  
 311 **empirical connectomes. (a)** The energy of the top-performing synthetic networks for each animal ( $N$   
 312  $= 49$ ) across thirteen generative rules: a purely spatial model, which considers only the distance  
 313 between two regions; two homophily models, which also consider a measure of the similarity of the  
 314 neighbourhoods of the respective regions; five clustering-based models, which compare the

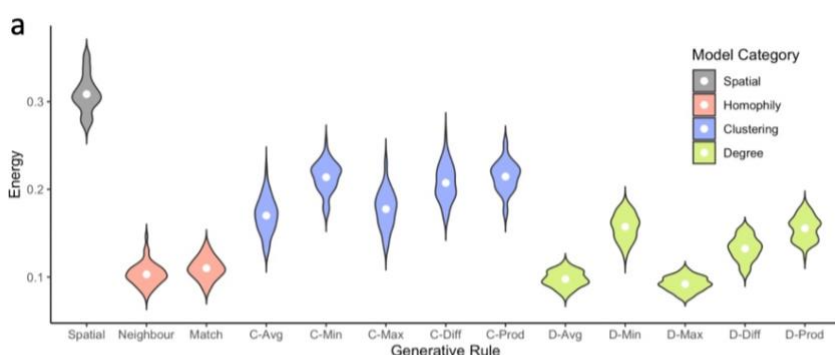

clustering coefficients of  
 the regions; and five  
 degree-based models,  
 which compare their node  
 degree. White points  
 indicate the sample mean.

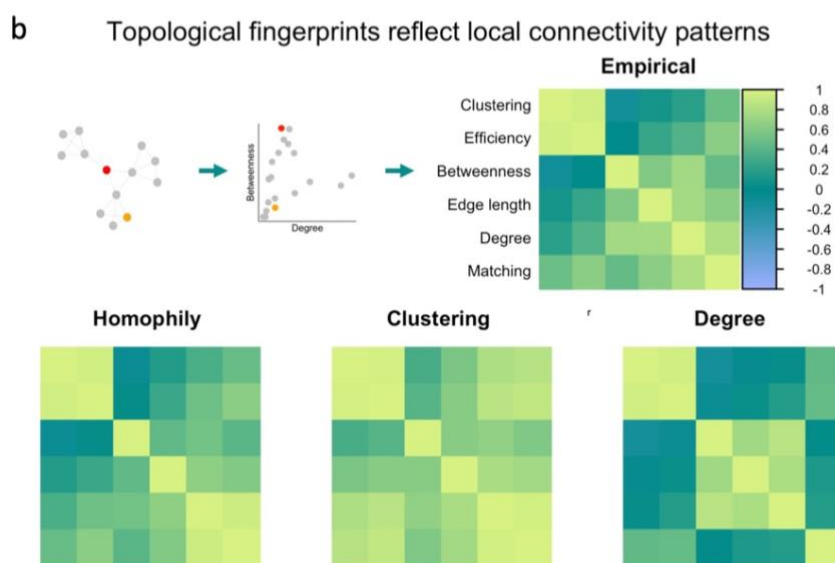

(b) The topological  
 fingerprint is a correlation  
 matrix of local network  
 statistics, including node  
 degree, clustering  
 coefficient, betweenness  
 centrality, total edge  
 length, local efficiency,  
 and mean matching  
 index. Topological  
 fingerprints are shown for  
 the empirical networks  
 and the best-performing  
 rules across the three  
 categories of generative  
 models. Across all four  
 matrices, the value of the  
 correlation can be  
 inferred from the colour  
 bar, which spans -1  
 (purple) to 1 (green).  
 Correlations shown are  
 the sample average ( $N =$   
 49).

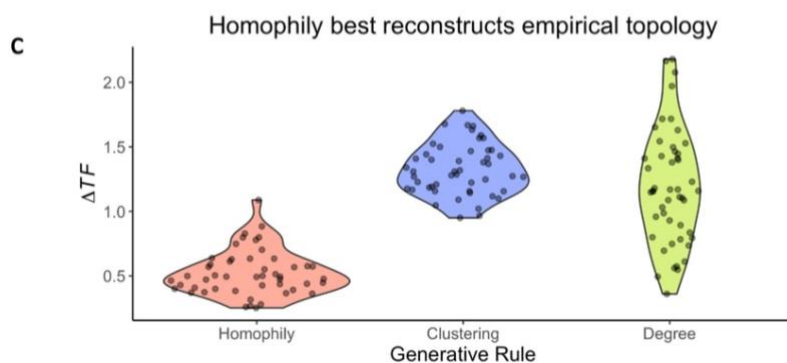

(c) Across the sample  
 ( $N = 49$ ), homophily  
 achieves lowest  $\Delta TF$ , a  
 measure of the  
 discrepancy in local  
 patterns of connectivity  
 between the simulations  
 and empirical  
 connectomes.



353  
354  
355  
356  
357  
358  
359  
360  
361  
362  
363  
364  
365  
366  
367

### Homophily replicates spatial layout of empirical networks

Given that the wiring of biological neural networks is shaped by their embedding in anatomical space<sup>36</sup>, realistic synthetic connectomes should ideally exhibit a spatial layout akin to that of connectomes derived from tractography. To test this similarity, we first calculated the six characteristics of each node of the parcellation, averaged across the sample, then correlated the values between simulated and empirical connectomes<sup>21,22</sup>. As shown in **Figure 3**, all four measures included in the energy equation exhibited significant correlations: degree ( $r = 0.360$ ,  $p = 2.68 \times 10^{-5}$ ), clustering coefficient ( $r = 0.346$ ,  $p = 5.40 \times 10^{-5}$ ), betweenness centrality ( $r = 0.530$ ,  $p = 9.33 \times 10^{-11}$ ), and edge length ( $r = 0.543$ ,  $p = 2.52 \times 10^{-11}$ ). Correlations were also observed between synthetic and empirical nodes on local efficiency ( $r = 0.420$ ,  $p = 7.01 \times 10^{-7}$ ) and mean matching index ( $r = 0.334$ ,  $p = 1.02 \times 10^{-4}$ ), confirming that the simulations replicated the spatial layout of nodal features that were not used to optimise model parameterisation.

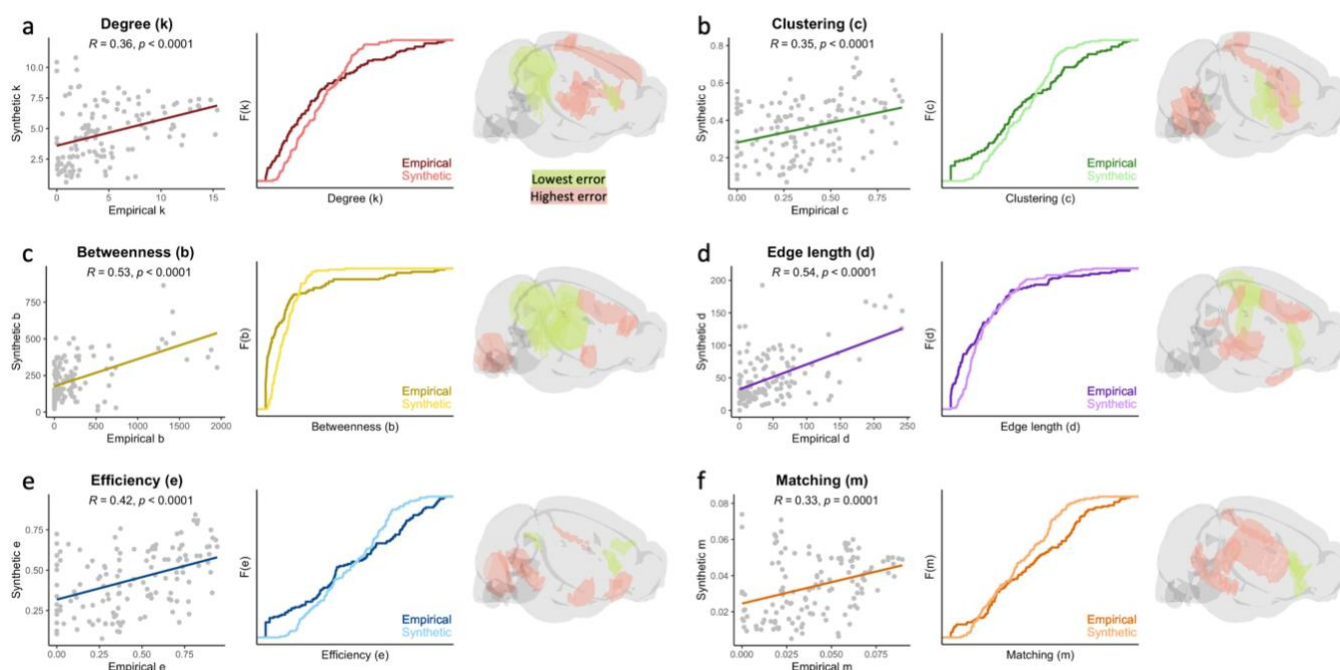

368 **Figure 3. Simulated networks replicate spatial layout of empirical connectomes.** Each point in the  
369 scatterplots represents the nodal measure for one of the 130 regions of the parcellation, taken as the  
370 average value across animals ( $N = 49$ ). For each of the six measures, a significant positive correlation  
371 exists between the nodes of synthetic and empirical networks. A cumulative density function of the  
372 measure is also displayed, as well as a visualisation of the mouse brain in which the five regions with  
373 the lowest and highest error (i.e., discrepancy between synthetic and empirical networks) are  
374 highlighted in green and red respectively. Four of the statistics ((a) node degree, (b) clustering  
375 coefficient, (c) betweenness centrality, and (d) total edge length) are terms of the energy equation  
376 used to assess the fit of the synthetic networks, while the remaining statistics ((e) local efficiency and  
377 (f) mean matching index) are not.

378

379 We also assessed discrepancies between the simulated and observed connectomes in the  
380 layout of these local characteristics. At each node, we computed a measure of spatial error

381 by subtracting the average value of each characteristic in the synthetic networks from its  
382 average value in the empirical connectomes<sup>22</sup>. Thus, a lower spatial error indicates more  
383 similarity between the local topology of a particular region in the simulations and in the  
384 observed connectomes. While overall spatial error was distributed throughout the brain  
385 (**Supplementary Table S4**), a significant correlation was observed between spatial error and  
386 node degree in the seed network ( $r = 0.436$ ,  $p = 2.221 \times 10^{-7}$ ) (**Supplementary Table S5**). This  
387 indicates that generative models may benefit from instructions as to where to begin adding  
388 connections if they are to best replicate the spatial patterning of network characteristics.

389

### 390 **Early adversity attenuates wiring constraints in optimal simulations**

391 Across all generative models, the homophily model implementing the neighbour rule  
392 exhibited the smallest coefficient of variation in the  $\gamma$  parameter and second smallest in the  
393  $\eta$  parameter (**Supplementary Table S3**). Thus while this rule was best able to account for  
394 variations in topology across animals, it did so through minute adjustments in the weighting  
395 of its cost and value terms, likely indicative of the highly regulated nature of connectomic  
396 organisation (**Figure 4a**). To obtain maximally precise parameters for each animal, we  
397 therefore performed a second search of 40,000 parameter combinations in a narrow space  
398 centred at the apparent minimum of the energy landscape:  $-3.75 \leq \eta \leq -1.75$  and  $0.2 \leq$   
399  $\gamma \leq 0.6$ .

400

401 The parameters producing the lowest-energy networks for each animal are shown in **Figure**  
402 **4b**. The cost and value parameters were moderately correlated ( $r = -0.574$ ,  $p = 1.65 \times 10^{-5}$ ),  
403 placing the simulations on an axis from the origin of the parameter space ( $\eta = 0$ ,  $\gamma = 0$ ).  
404 This indicates that simulations with a more severe penalty on long-distance connections  
405 usually had stronger preference for connections between regions with shared neighbours.

406

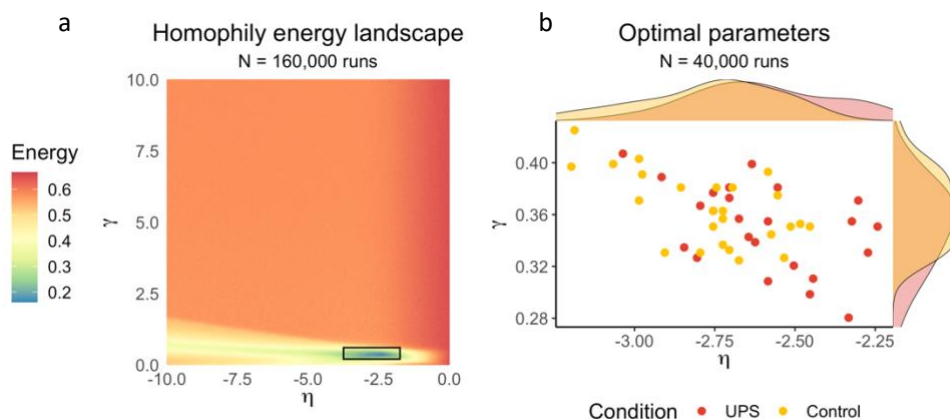

407 **Figure 4. Adversity attenuates optimal generative modelling parameters.** (a) In the first run of the  
408 homophily model, 160,000 unique combinations of cost parameter  $\eta$  and value parameter  $\gamma$  were  
409 tested. The energy surface shown is the sample average ( $N = 49$ ). (b) Optimal values of  $\eta$  and  $\gamma$   
410 produce the lowest-energy synthetic networks. Values were obtained by testing an additional 40,000  
411 parameter combinations in a narrow low-energy window of the initial grid search, highlighted with a  
412 black rectangle in (a). Each data point in the scatterplot represents a single animal. Density plots  
413 above and to the right highlight differences between UPS and control conditions. Optimal  
414 parameters tend to fall closer to the origin for animals in the UPS condition (ANOVA  $F_{1,47} = 5.700$ ,  $p =$   
415  $0.021$ ).

416 Along this axis, animals in the UPS condition tended to fall closer to the origin; we confirmed  
417 this observation by comparing the length of a vector from the origin to each point between  
418 groups (UPS  $M = 2.63$ ,  $SD = 0.213$ , Control  $M = 2.79$ ,  $SD = 0.210$ ; ANOVA  $F_{1,47} = 5.700$ ,  $p =$   
419  $0.021$ ). The simulations for animals in the UPS condition were therefore subject to weaker  
420 constraints on the formation of connections. One possible confound here is that the models  
421 may simply perform better for one group than the other, but this was not the case: no  
422 difference in model energy was observed (UPS  $M = 0.101$ ,  $SD = 0.015$ , Control  $M = 0.105$ ,  $SD$   
423  $= 0.010$ ; ANOVA  $F_{1,47} = 0.719$ ,  $p = 0.401$ ).

424  
425 But what is the nature of this group difference in parameters? One possibility is that either  
426 or both parameters drive the change in a relatively independent manner. Alternatively, it  
427 could reflect a single underlying shift in wiring constraints that incorporates both  
428 parameters. We distinguished these alternatives using a partial least squares discriminant  
429 analysis (see **Methods**). This formally tests for the presence of underlying factors that  
430 explain the group difference in parameter combinations. There was a significant correlation  
431 between the group affiliation and the first latent variable ( $r = 0.36$ ,  $p_{\text{permuted}} = 0.011$ ) but not  
432 the second latent variable ( $p_{\text{permuted}} = 0.898$ ). Both parameters of the generative model ( $\eta$   
433 coefficient =  $-1.5549$ , 95% CI =  $[-1.8929 -1.2969]$ ;  $\gamma$  coefficient =  $0.1229$ , 95% CI =  $[0.0684$   
434 and  $0.1858]$ ) loaded significantly onto this component. There was no between-group  
435 difference in scores on the component (KS  $D_{1,47} = 0.308$ ,  $p = 0.159$ ). Thus, it seems that the  
436 observed group difference in location in the parameter space reflects a change that  
437 incorporates both wiring parameters, rather than reflecting one or two independent effects.

438

#### 439 **Shift in wiring economy induces greater stochasticity**

440 Simulations closer to the origin of the parameter space have greater stochasticity or  
441 randomness in the generative process<sup>31</sup>. To understand why this is the case, imagine that  
442 the edges in the wiring probability matrix are competing with one another. When the cost  
443 penalty and topological preferences are strong, fewer edges have high probabilities of  
444 wiring and the preferred winner is clear. But when constraints are weaker, more edges  
445 qualify as good contenders, giving the probabilistic nature of the process a greater role in  
446 the gradual organisation of the network.

447  
448 Simulations for the UPS condition showed a flatter distribution with a greater dispersion of  
449 values in the probability matrix compared to the control condition (**Figure 5a**; KS  $D_{1,47} =$   
450  $0.055$ ,  $p = 2.20 \times 10^{-16}$ ), corresponding to more potential connections with higher  
451 probabilities of wiring and therefore heightened stochasticity. Variance among wiring  
452 probabilities rose over the course of the development of each simulation, particularly in the  
453 UPS condition, indicating that this increase in stochasticity was more pronounced later in  
454 the generative process (**Figure 5b**). At the end of the generative process, the simulations for  
455 mice in the UPS condition exhibited a distribution of node degree that was closer to normal  
456 (kurtosis: KS  $D_{1,47} = 0.475$ ,  $p = 0.005$ ), indicating that the shift in wiring probabilities subtly  
457 randomized network topology.

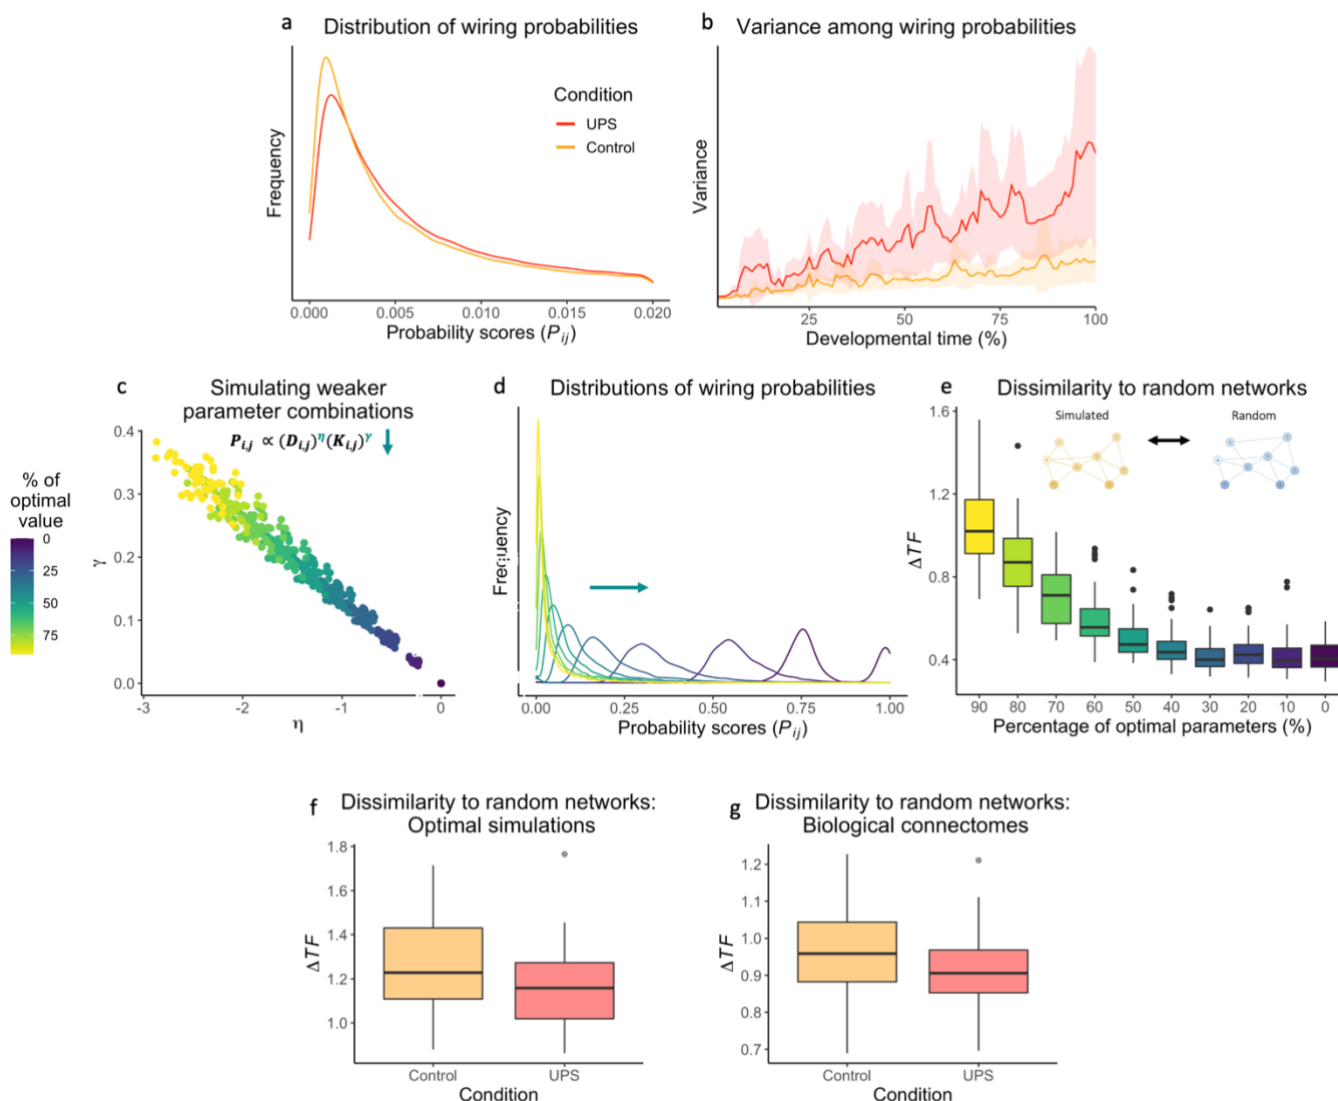

458

459 **Figure 5. Weaker wiring constraints heighten stochasticity of network development. (a)**

460 *Distributions of wiring probabilities ( $P_{i,j}$ ) within the probability matrix, taken as the group averages*

461 *across all steps of optimal simulations. The UPS condition shows a flatter distribution with greater*

462 *dispersion, corresponding to more connections with higher wiring probabilities. (b) Variance among*

463 *values in the probability matrix ( $P_{i,j}$ ) corresponds to the dispersion of likelihoods of potential future*

464 *connections. Wiring probability variance rises as simulations develop, especially in the UPS condition,*

465 *indicating that model stochasticity was more pronounced later in the process. (c) To assess the effect*

466 *of systematically manipulating wiring constraints, simulations were run at 10% increments from the*

467 *optimal values for each animal to zero. This resulted in the 490 parameter combinations plotted in*

468 *this space. (d) Distributions of wiring probabilities ( $P_{i,j}$ ) within the probability matrix, taken as the*

469 *average across all steps, at each parameter interval. Wiring probabilities for simulations with weaker*

470 *parameters approach a normal distribution. (e) Topological dissimilarity ( $\Delta TF$ ; see Methods) was*

471 *averaged across 1000 randomly wired networks. The organisation of simulated networks gradually*

472 *resembles random topology as parameters approach zero. The same trend is observed when*

473 *comparing the UPS condition to the control condition, both for (f) optimal generative models and (g)*

474 *biological connectomes derived through tractography.*

475

476 To explore the relationship between model stochasticity and parameters more  
477 systematically, we produced simulations using incrementally smaller values of  $\eta$  and  $\gamma$ .  
478 Specifically, we ran generative models at 10% increments from the optimal parameters for  
479 each animal, at each stage moving towards the origin of the parameter space (**Figure 5c**).  
480

481 As the parameters neared  $\eta = 0$  and  $\gamma = 0$ , the distribution of values within the wiring  
482 probability matrices ( $P_{i,j}$ ) exhibited greater dispersion (**Figure 5d**). This corresponds to a  
483 greater number of connections with high probability of wiring over the course of the  
484 generative process. Simulations with smaller wiring parameters had a more random  
485 topology (**Figure 5e**), as measured by the average  $\Delta TF$  to 1000 randomly wired networks.  
486 We found the same trend toward random network topology in the UPS group, both in the  
487 optimal simulations (**Figure 5f**; UPS  $M = 1.18$ ,  $SD = 0.214$ , Control  $M = 1.27$ ,  $SD = 0.214$ ,  
488 ANOVA  $F_{1,47} = 2.158$ ,  $p = 0.148$ ) and the biological connectomes (**Figure 5g**; UPS  $M = 0.915$ ,  
489  $SD = 0.125$ , Control  $M = 0.973$ ,  $SD = 0.126$ , ANOVA  $F_{1,47} = 2.647$ ,  $p = 0.110$ ). Though subtle,  
490 this trend is in line with the principle that weaker wiring constraints heighten stochasticity in  
491 the formation of structural connections, thereby leading to more random brain network  
492 topology.

493

494

### Discussion

495 We explored the effects of early adversity on the development of the structural  
496 connectome. We deployed generative network modelling in a mouse model of  
497 unpredictable postnatal stress (UPS) to test whether adversity alters the economic trade-off  
498 that governs structural brain development. The parameters that best simulated the rodent  
499 connectomes were closer to zero for the mice exposed to UPS, resulting in greater  
500 variability in wiring probabilities and therefore stochasticity in the generative process. Thus,  
501 exposure to a chaotic and unpredictable environment appears to attenuate the constraints  
502 governing brain development such that the formation of structural connections is subject to  
503 weaker control. These results point to a crucial intermediate level of explanation for the  
504 developmental impact of early adversity.

505

506 Replicating prior work in generative network modelling, models with a topological term  
507 outperformed that based purely on distance<sup>16,21,22,34</sup>, and models implementing the  
508 principle of homophily produced the most realistic structural connectomes<sup>16,21,22,34</sup>. These  
509 findings accord well with previous research on the development of the mouse brain; wiring  
510 cost alone is not sufficient to recapitulate the complex topology of its macroscopic  
511 structural networks<sup>17</sup>. In our study, the neighbour rule – which favours connections  
512 between regions with a greater number of shared neighbours – produced networks that  
513 possessed not only similar statistical distributions of nodal characteristics, but also their  
514 local organisation and spatial layout. Importantly, this organisation was not hard-coded into  
515 the algorithm but emerged from the trade-off between cost and value over the course of  
516 the generative process. Our study is the first to implement the two-parameter generative  
517 model in rodents and replicate the comparative success of homophily in this species. One  
518 potential explanation for its success may be that it captures macroscopic dynamics of  
519 Hebbian learning: as regions with similar neighbourhoods are likely to experience  
520 comparable patterns of stimulation, mechanisms of activity-dependent plasticity would  
521 favour their consolidation into a structural network<sup>37,38</sup>.

522



523 The parameters that produced the best-fitting synthetic networks differed between mice  
524 according to their exposure to early adversity. Specifically, simulations for mice in the UPS  
525 condition were subject to a more moderate penalty on long-distance connections and a  
526 weaker preference for connections between regions with shared neighbours. The negative  
527 correlation between model parameters, in line with previously findings<sup>22,34</sup> (but see also<sup>21</sup>),  
528 indicates that individuals negotiate the wiring economy of the brain by co-varying the two  
529 constraints. However, it is still possible that a single parameter accounts for the observed  
530 group difference. Using a partial least-squares discriminant analysis, we confirmed that a  
531 single latent factor that incorporates both the cost penalty and value term best explains the  
532 relationship between model parameters and group affiliation. As evolutionary pressures  
533 have favoured heightened phenotypic plasticity in harsh, unpredictable environments, even  
534 when this is energetically costly<sup>39,40</sup>, the brain may respond to early unpredictable stress by  
535 attenuating overall constraints on the formation of new structural connections. This finding  
536 is particularly important because existing measures of global organisation of brain structure  
537 do not have the granularity to detect the effects of early adversity. In other words, it  
538 appears that a generative modelling approach can capture complex and subtle outcomes of  
539 adversity by reducing many measures of neural organisation to a single latent factor,  
540 namely, the wiring economy of the brain.

541  
542 As lower-magnitude wiring parameters correspond to heightened model stochasticity, early  
543 adversity appears to favour more random formation of structural connections. Given that  
544 UPS mice show impaired fear learning<sup>28</sup> and weaker wiring constraints are associated with  
545 poorer cognitive abilities in children<sup>22</sup>, our results might therefore offer a mechanistic  
546 account for the previous finding that growing up in an unpredictable environment can  
547 hamper cognitive development<sup>41</sup>. However, greater stochasticity in network development  
548 may also reflect an advantageous process of adaptation, as individuals exposed to early  
549 adversity tend to show skills and abilities that are conducive to successfully navigating  
550 stressful contexts<sup>39</sup>. Across scales, the probabilistic development of neural tissue harnesses  
551 stochastic and noisy processes to build circuits that are robust to perturbation<sup>42</sup>. In an  
552 adverse or unpredictable environment, heightened stochasticity in the development of the  
553 structural connectome could be adaptive if it enables the nervous system to respond more  
554 effectively to future challenges in hostile environments<sup>40</sup>. This proposal is consistent with a  
555 recent finding that the connectomes of children with cognitive difficulties are more robust  
556 to random attacks on networks hubs<sup>10</sup>.

557  
558 It is important to note that, while we have verified that the organisation of the synthetic  
559 networks replicates that of the empirical connectomes, they remain simulations. As such,  
560 our generative models do not provide conclusive evidence of longitudinal differences in  
561 neural development<sup>18</sup>. Future work could increase the biological complexity of the  
562 simulations in a few key ways. First, as the binarization of the connectomes is a gross  
563 simplification, a generative modelling strategy that produces weighted networks would be a  
564 welcome next step. Second, as structural neurodevelopment entails not just the formation  
565 of connections but their pruning, consolidation, and myelination<sup>43</sup>, models may benefit from  
566 varying rules and parameters across space and time. Additionally, models could incorporate  
567 other facts known to shape the emergence of connectivity, such as the functional identity or  
568 morphology of regions<sup>44,45</sup>. As UPS can have sex-specific effects on brain structure<sup>28</sup>, future  
569 work should test for sex differences in the wiring economy of the brain. Finally, comparing



570 the effects of UPS to a simpler paradigm that consists only of limited bedding could reveal  
571 whether unpredictability or impoverishment is responsible for the observed shift in wiring  
572 constraints.

573

574 In conclusion, we found that unpredictable postnatal stress changes the economic  
575 conditions that govern the formation of macroscopic structural connections in the brain.  
576 Our results offer a promising and mathematically specified path toward understanding how  
577 early life adversity contributes to diversity in structural brain network organisation.

578

579

## Methods

### 580 **Animals**

581 Thirty female BALB/cByJ mice were housed in breeding cages with standard bedding, and  
582 subsequently transferred to maternity cages once visibly pregnant. On postnatal day zero  
583 (P0), litters were culled to five to eight pups and randomly assigned to dams to mitigate the  
584 effects of genetics and litter size. Of 49 total pups, 25 (13 male and 12 female) were  
585 assigned to a control group, whilst 24 (12 male and 12 female) were assigned to an  
586 unpredictable early-life stress (UPS) condition. Mice in the control group were raised with  
587 standard bedding and nesting material. Mice in the UPS group received 25% of the standard  
588 amount of bedding material, no nesting material, and were separated from their dam for  
589 one hour on P14, P16, P17, P21, P22, and P25. Additional details about the paradigm are  
590 available elsewhere<sup>30</sup>. After weaning on P26, all mice were group housed with standard  
591 bedding and no nesting material. All experiments received the approval of the Institutional  
592 Animal Care and Use Committee (IACUC) at Yale University and were conducted in  
593 accordance with the NIH Guide for the Care and the Use of Laboratory Animals.

594

### 595 **Tissue and imaging acquisition**

596 Tissue was collected from the mice in adulthood (> P70) after the conclusion of behavioural  
597 testing unrelated to this analysis. Mice were anesthetized with chloral hydrate (100 mg/kg)  
598 and, once unresponsive, transcardially perfused using cold PBS/heparin (50 units/ml)  
599 solution followed by 10% formalin (polyScience). The mice were decapitated, and intact  
600 skulls were immersed in 10% formalin at 4°C for 24 hours, transferred to sterile 1 X PBS (pH  
601 7.4), and kept at 4°C until imaging acquisition.

602

603 Magnetic resonance images were acquired at imaging facility of New York University using a  
604 7-Tesla scanner equipped with a cryogenic probe for enhanced signal-to-noise<sup>46</sup>. A modified  
605 3D-GRASE sequence was used with an echo time (TE) of 33 ms, repetition time (TR) of 400  
606 ms, 100 µm isotropic resolution, two non-diffusion-weighted (b0) images and 60 images  
607 acquired at unique gradient directions with  $b = 5000/\text{mm}^2$ <sup>47</sup>. Additional acquisition details  
608 are available in a protocol paper<sup>48</sup>.

609

610 Images were corrected for noise and Gibbs ringing artefacts using MRtrix3<sup>49–51</sup>,  
611 displacement and eddy currents using FSL<sup>52</sup>, and field bias using the N4 algorithm provided  
612 in Advanced Normalization Tools (ANTs)<sup>53</sup>.

613

### 614 **Connectome construction and comparisons**

615 For each subject, a map of brain connectivity was reconstructed using probabilistic  
616 tractography. First, unsupervised estimation of tissue-specific response functions was

617 conducted using the Dhollander algorithm<sup>54</sup>. The fibre orientation distribution was then  
618 estimated using multi-shell multi-tissue constrained spherical deconvolution (MSMT CSD)<sup>55</sup>.  
619 Probabilistic streamline fibre tracking with second-order integration (iFOD2)<sup>56</sup> was  
620 performed with whole-brain seeding until ten million streamlines were reached. Fibre  
621 tracking parameters were optimized for ex-vivo rodent tissue (step size 50  $\mu\text{m}$ , curvature  
622 threshold 45°, FA threshold 0.1, minimum fibre length 0.5 mm)<sup>57,58</sup>.

623  
624 A structural connectome was then built from each tractogram using a parcellation  
625 previously adapted from the Allen Mouse Brain Atlas (AMBA) and Allen Developing Mouse  
626 Brain Atlas (ADMBA) by Rubinov and colleagues<sup>17</sup>. The bilaterally symmetric parcellation  
627 consists of 41 cortical and 24 extracortical regions per hemisphere, for a total of 130  
628 regions. Using ANTs<sup>59</sup>, each subject image was first registered to the AMBA template space  
629 using affine and diffeomorphic transformations, then the inverse transformation was used  
630 to project the parcellation into subject space. The number of streamlines connecting each  
631 pair of regions were counted and transformed into connectivity matrices, which were  
632 symmetrized. Self-connections were removed. To eliminate spurious connections and  
633 highlight topological variation across subjects<sup>60</sup>, we applied a weight-based threshold of  
634 6100 streamlines to achieve a sparse connectome density ( $M = 3.52\%$ ,  $SD = 0.13\%$ ).  
635 Thresholded connectomes were then binarized.

636  
637 Connectomes were compared on five measures of global topology: (1) number of edges; (2)  
638 total edge length, approximated using the sum of the Euclidean distances between  
639 connected regions; (3) number of long-distance edges, defined as connections that are  
640 more than two standard deviations above the mean connection length across the sample;  
641 (4) global efficiency, calculated as the average inverse shortest path length of the network<sup>8</sup>;  
642 (5) small-worldness, defined as the ratio of clustering to shortest path length compared to  
643 its random network equivalent<sup>61</sup>, which we obtained by averaging across an ensemble of  
644 500 networks that were randomized whilst preserving the degree distribution.

645  
646 Wherever group differences were assessed, a Shapiro test was first applied to test the  
647 normality of the distributions; normal distributions were compared using ANOVA, while  
648 others were compared using a KS test.

#### 649 650 **Generative network modelling procedure**

651 Synthetic networks were produced for each subject through a generative modelling  
652 procedure<sup>16,21</sup>. First, a seed network was constructed by identifying edges shared by all mice  
653 and selecting the strongest  $N = 28$  so that, in line with previous work<sup>21,22</sup>, the seed would  
654 comprise about 10% of the final network density. The use of a seed network ensures  
655 parsimony, which is particularly important given the similarity of the rodent connectomes;  
656 see **Supplementary Figure S1** for additional details on seed network construction. A single  
657 edge at a time was then added to the seed network according to the following probability  
658 equation<sup>16</sup>:

$$659 \quad P_{i,j} \propto (D_{i,j})^\eta (K_{i,j})^\gamma \quad (1)$$

660  
661  
662 The first term  $D_{i,j}$  quantifies the distance between nodes  $i$  and  $j$ , calculated as the Euclidean  
663 distance between the centroids of each brain region in the parcellation. The parameter  $\eta$

664 determines the direction and strength of the contribution of distance to wiring probability  
665 (i.e., a negative value penalizes long edges while a positive value favours long edges, and a  
666 large value would produce a stronger effect than a small value).

667  
668 The second term  $K_{i,j}$  quantifies the topological similarity of nodes  $i$  and  $j$  as specified by  
669 each generative rule, and the parameter  $\gamma$  determines the direction and strength of its  
670 contribution to wiring probability. As each added edge changes the topological similarity of  
671 certain nodes,  $K_{i,j}$  and  $P_{i,j}$  are continually updated at every step of the generative process.  
672 If an edge is added between nodes  $i$  and  $j$ ,  $P_{i,j}$  is set to zero.

673

## 674 **Evaluation of generative models**

### 675 *Model energy*

676 The generative process was terminated when the number of edges of the synthetic network  
677 matched that of the empirical network. The fit of each synthetic network was assessed  
678 according to the following energy equation<sup>21</sup>:

679

$$680 \quad E = \max(KS_k, KS_c, KS_b, KS_d) \quad (2)$$

681

682 The equation consists of the Kolmogorov-Smirnov (KS) statistics comparing the synthetic  
683 and empirical networks on distributions of node degree ( $k$ ), clustering coefficients ( $c$ ),  
684 betweenness centrality ( $b$ ), and edge length ( $d$ ). Thus, a synthetic network that closely  
685 resembled the empirical connectome in all four distributions would have a low energy,  
686 while a network that greatly differed from the empirical connectome on any one of the four  
687 would have a high energy.

688

689 In addition to a purely spatial model, which did not include a topological term, we assessed  
690 three categories of generative models: two homophily models (number of common  
691 neighbours and the matching index); five clustering-based models (the average, minimum,  
692 maximum, difference in, and product of clustering coefficients); and five degree-based  
693 models (the average, minimum, maximum, difference in, and product of node degrees)<sup>21</sup>.

694 Each model was computed using the Brain Connectivity Toolbox

695 (<https://sites.google.com/site/bctnet/Home>) in MATLAB.

696

697 To find the optimal parameters for each model, we performed a grid search in the space  
698 defined by  $-10 \leq \eta \leq 0$  and  $0 \leq \gamma \leq 10$ . This approach was used to assess variability in  
699 model energies across the parameter space. A total of 160,000 parameter combinations  
700 were tested per subject and model, corresponding to 40,000 unique values of both  $\eta$  and  $\gamma$ .

701

### 702 *Model topological fingerprints*

703 To test the ability of generative models to replicate local hallmarks of empirical connectivity,  
704 we calculated the topological fingerprint matrices of both empirical and synthetic networks.  
705 TF matrices are a recently developed measure that consist of n-by-n correlation matrices of  
706 n local network statistics<sup>31</sup>. We included six common measures of topology in our TF  
707 matrices: node degree, betweenness centrality, clustering coefficient, edge length, local  
708 efficiency, and matching index. Each measure was calculated for all 130 nodes, then the  
709 Pearson correlation between each pair of measures was calculated and the correlations  
710 were averaged across subjects. A visual comparison of the synthetic and empirical TF

711 matrices provides a heuristic for assessing the similarity of the correlational structure of  
712 their topology, and thereby evaluating the generative models' ability to replicate the  
713 organisation of empirical networks. To quantify this formally, we calculated the difference in  
714 their TF matrices according to the following equation<sup>31</sup>:

715

$$716 \quad \Delta TF_{i,j} = \sqrt{\sum_i \sum_j (TF_{empirical_{i,j}} - TF_{synthetic_{i,j}})^2} \quad (3)$$

717

718 Here,  $\Delta TF$  is calculated as the Euclidean norm of the difference between empirical and  
719 synthetic TF matrices. We used  $\Delta TF$  to compare the generative rules from each category  
720 (i.e., spatial, homophily, clustering and degree) that produced the lowest-energy networks.  
721 The generative rule that obtained the lowest  $\Delta TF$  was used in all subsequent analyses. To  
722 obtain accurate estimates of the optimal parameters for each subject, a second grid search  
723 of an additional 40,000 parameter combinations was performed in a much smaller  
724 parameter space defined by  $-3.75 \leq \eta \leq -1.75$  and  $0.2 \leq \gamma \leq 0.6$ .

725

#### 726 *Modal spatial layout*

727 The spatial layout of the six nodal measures was also assessed<sup>22</sup>. Four of these measures  
728 (node degree, betweenness centrality, clustering coefficient, and edge length) are included  
729 in the energy equation while two (local efficiency and matching index) are not. For each  
730 measure, the value at each node was averaged across the synthetic networks of all 49  
731 subjects, resulting in a single 130-by-1 vector. The same procedure was performed on the  
732 empirical connectomes. Linear correlations between synthetic and empirical vectors were  
733 then calculated. At each node, the spatial error (or discrepancy) of each measure was  
734 calculated by subtracting its average value in the synthetic networks from its average value  
735 in the empirical connectomes<sup>22</sup>. Thus, a lower spatial error indicates more similarity  
736 between the local topology of a particular region in the simulations and in the observed  
737 connectomes. An absolute error was calculated as the sum of the Z-scores of all six  
738 generative errors.

739

#### 740 **Group comparisons on generative modelling parameters**

741 A partial least squares (PLS) discriminant analysis<sup>62</sup> was run to test whether the optimal  
742 model parameters (i.e. the values of  $\eta$  and  $\gamma$  producing the lowest-energy simulations)  
743 reflected of a single latent factor. The correlation between each predictor component and  
744 the primary response component was calculated, and their significance was assessed by  
745 permuting the group membership of the mice 100,000 times. For the loading of each  
746 parameter onto the PLS components, 95% confidence intervals were calculated by  
747 generating 100,000 bootstrapped samples of 49 subjects and re-computing the loadings.

748

749 The distance of each mouse from the origin of the parameter space (i.e.  $\eta = 0$  and  $\gamma = 0$ )  
750 was then calculated and compared between groups using ANOVA.

751

#### 752 **Exploration of model stochasticity**

753 To explore the implications of a shift in model parameters, the composition of the wiring  
754 probability matrices ( $P_{i,j}$ ) was also compared between groups<sup>31</sup>. This was achieved by  
755 testing for differences in the distribution of probability values in the wiring matrix, taken as

756 the average across all steps of the lowest-energy simulations. To examine whether the  
757 dispersion among probability values emerges over the course of the generative process, we  
758 calculated the variance among wiring probabilities across developmental time.

759

760 To explore the effects of attenuated model parameters more systematically, additional  
761 simulations were run scaling  $\eta$  and  $\gamma$  toward zero (i.e. running models at 90%, 80%, 70%,  
762 60%, 50%, 40%, 30%, 20%, 10%, and 0% of the optimal parameters). The distribution of  
763 values found in the wiring probability matrices ( $P_{i,j}$ ) of these simulations was measured and  
764 plotted. To evaluate the randomness of simulation topology, the final networks for each of  
765 these simulations were compared to 1000 randomly wired networks using the  $\Delta TF$  measure  
766 described above. The same comparison was conducted using the optimal simulations for  
767 each mouse, and the biological connectomes derived through tractography.

768

### 769 **Open access statement**

770 Generative network modelling and analyses of synthetic networks were conducted in  
771 MATLAB, and visualisations were produced using RStudio for R. All code is available on the  
772 Open Science Framework (OSF) at [osf.io/evgw5](https://osf.io/evgw5). Imaging data are available upon request to  
773 the authors. Structural connectivity matrices for each animal can be found on the OSF at  
774 [osf.io/evgw5](https://osf.io/evgw5). For the purpose of open access, the author has applied a Creative Commons  
775 Attribution (CC BY) licence to any Author Accepted Manuscript version arising from this  
776 submission.

777

### 778 **Acknowledgements**

779 The authors would like to thank Mikail Rubinov for providing the parcellation. This work was  
780 supported by a British Marshall Scholarship to SC, MRC intramural award G101400 to JH,  
781 MRC programme grant MC-A060-5PQ40 to DEA, and TWCF Grant 0159 to DEA. All research  
782 at the Department of Psychiatry in the University of Cambridge is supported by the NIHR  
783 Cambridge Biomedical Research Centre (BRC-1215-20014) and NIHR Applied Research  
784 Centre. The views expressed are those of the author(s) and not necessarily those of the  
785 NIHR or the Department of Health and Social Care.

786

### 787 **Author contributions**

788 SC, JH, DA, and DEA conceived the analysis. AP and AK carried out the paradigm and TMA  
789 and JZ collected the imaging data. SC processed the imaging data, constructed the  
790 connectomes, executed the models, and analysed the results under the supervision of JH  
791 and DEA. SC drafted the manuscript and JH, EB, PEV, AK, DA, and DEA provided critical edits.  
792 All authors reviewed and approved the manuscript.

793

794

795

796

797

798

799

800

801

802



803 **References**

804

- 805 1. Bethlehem, R. A. I. *et al.* Brain charts for the human lifespan. *Nature* **604**, 525–533  
806 (2022).
- 807 2. Scholz, J., Klein, M. C., Behrens, T. E. J. & Johansen-Berg, H. Training induces changes  
808 in white matter architecture. *Nat. Neurosci.* **12**, 1370 (2009).
- 809 3. Stiles, J. & Jernigan, T. L. The basics of brain development. *Neuropsychology Review*  
810 vol. 20 327–348 (2010).
- 811 4. Dubois, J. *et al.* The early development of brain white matter: A review of imaging  
812 studies in fetuses, newborns and infants. *Neuroscience* **276**, 48–71 (2014).
- 813 5. Sotiropoulos, S. N. & Zalesky, A. Building connectomes using diffusion MRI: why, how  
814 and but. *NMR Biomed.* **32**, e3752 (2019).
- 815 6. Betzel, R. F. Network neuroscience and the connectomics revolution. in *Connectomic*  
816 *Deep Brain Stimulation* (ed. Horn, A. B. T.-C. D. B. S.) 25–58 (Academic Press, 2022).  
817 doi:<https://doi.org/10.1016/B978-0-12-821861-7.00002-6>.
- 818 7. Kaiser, M. Mechanisms of Connectome Development. *Trends Cogn. Sci.* **21**, 703–717  
819 (2017).
- 820 8. Bullmore, E. & Sporns, O. Complex brain networks: graph theoretical analysis of  
821 structural and functional systems. *Nat. Rev. Neurosci.* 2009 103 **10**, 186–198 (2009).
- 822 9. Bullmore, E. & Sporns, O. The economy of brain network organization. *Nature*  
823 *Reviews Neuroscience* vol. 13 336–349 (2012).
- 824 10. Siugzdaite, R., Bathelt, J., Holmes, J. & Astle, D. E. Transdiagnostic Brain Mapping in  
825 Developmental Disorders. *Curr. Biol.* **30**, 1245–1257.e4 (2020).
- 826 11. DiMartino, A. *et al.* Unraveling the miswired connectome: A developmental  
827 perspective. *Neuron* vol. 83 1335–1353 (2014).
- 828 12. Cheriak, C. Component placement optimization in the brain. *J. Neurosci.* **14**, 2418–  
829 2427 (1994).
- 830 13. Chen, B. L., Hall, D. H. & Chklovskii, D. B. Wiring optimization can relate neuronal  
831 structure and function. *Proc. Natl. Acad. Sci. U. S. A.* **103**, 4723–4728 (2006).
- 832 14. Kaiser, M. & Hilgetag, C. C. Modelling the development of cortical systems networks.  
833 *Neurocomputing* **58–60**, 297–302 (2004).
- 834 15. Costa, L. da F., Kaiser, M. & Hilgetag, C. C. Predicting the connectivity of primate  
835 cortical networks from topological and spatial node properties. *BMC Syst. Biol.* **1**, 1–  
836 17 (2007).
- 837 16. Vértes, P. E. *et al.* Simple models of human brain functional networks. *Proc. Natl.*  
838 *Acad. Sci. U. S. A.* **109**, 5868–5873 (2012).
- 839 17. Rubinov, M., Ypma, R. J. F., Watson, C. & Bullmore, E. T. Wiring cost and topological  
840 participation of the mouse brain connectome. *Proc. Natl. Acad. Sci. U. S. A.* **112**,  
841 10032–10037 (2015).
- 842 18. Bassett, D. S. & Betzel, R. F. Generative models for network neuroscience: Prospects  
843 and promise. *J. R. Soc. Interface* **14**, (2017).
- 844 19. Horvát, S. *et al.* Spatial Embedding and Wiring Cost Constrain the Functional Layout of  
845 the Cortical Network of Rodents and Primates. *PLOS Biol.* **14**, e1002512 (2016).
- 846 20. Beul, S. F., Barbas, H. & Hilgetag, C. C. A Predictive Structural Model of the Primate  
847 Connectome. *Sci. Reports 2017 71* **7**, 1–12 (2017).
- 848 21. Betzel, R. F. *et al.* Generative models of the human connectome. *Neuroimage* **124**,  
849 1054–1064 (2016).



- 850 22. Akarca, D. *et al.* A generative network model of neurodevelopmental diversity in  
851 structural brain organization. *Nat. Commun.* 2021 121 **12**, 1–18 (2021).
- 852 23. McLaughlin, K. A., Sheridan, M. A. & Lambert, H. K. Childhood adversity and neural  
853 development: Deprivation and threat as distinct dimensions of early experience.  
854 *Neurosci. Biobehav. Rev.* **47**, 578–591 (2014).
- 855 24. Teicher, M. H., Samson, J. A., Anderson, C. M. & Ohashi, K. The effects of childhood  
856 maltreatment on brain structure, function and connectivity. *Nat. Rev. Neurosci.* **17**,  
857 652–666 (2016).
- 858 25. Ohashi, K. *et al.* Childhood maltreatment is associated with alteration in global  
859 network fiber-tract architecture independent of history of depression and anxiety.  
860 *Neuroimage* **150**, 50–59 (2017).
- 861 26. McLaughlin, K. A., Weissman, D. & Bitrán, D. Childhood Adversity and Neural  
862 Development: A Systematic Review. *Annu. Rev. Dev. Psychol.* **1**, 277–312 (2019).
- 863 27. Luby, J. L., Baram, T. Z., Rogers, C. E. & Barch, D. M. Neurodevelopmental  
864 Optimization after Early-Life Adversity: Cross-Species Studies to Elucidate Sensitive  
865 Periods and Brain Mechanisms to Inform Early Intervention. *Trends Neurosci.* **43**,  
866 744–751 (2020).
- 867 28. White, J. D. *et al.* Early life stress causes sex-specific changes in adult fronto-limbic  
868 connectivity that differentially drive learning. *Elife* **9**, 1–29 (2020).
- 869 29. Wendel, K. M. *et al.* Early life adversity in male mice sculpts reward circuits.  
870 *Neurobiol. Stress* **15**, 100409 (2021).
- 871 30. Johnson, F. K. *et al.* Amygdala hyper-connectivity in a mouse model of unpredictable  
872 early life stress. *Transl. Psychiatry* 2018 81 **8**, 1–14 (2018).
- 873 31. Akarca, D. *et al.* Homophilic wiring principles underpin neuronal network topology in  
874 vitro. *bioRxiv* (2022).
- 875 32. Ho, T. C., Dennis, E. L., Thompson, P. M. & Gotlib, I. H. Network-based approaches to  
876 examining stress in the adolescent brain. *Neurobiology of Stress* vol. 8 147–157  
877 (2018).
- 878 33. Menon, V. Large-scale brain networks and psychopathology: a unifying triple network  
879 model. *Trends Cogn. Sci.* **15**, 483–506 (2011).
- 880 34. Zhang, X. *et al.* Generative network models of altered structural brain connectivity in  
881 schizophrenia. *Neuroimage* **225**, 117510 (2021).
- 882 35. Fornito, A., Zalesky, A. & Bullmore, E. T. Fundamentals of brain network analysis. 476.
- 883 36. Bassett, D. S. & Stiso, J. Spatial brain networks. *Comptes Rendus Phys.* **19**, 253–264  
884 (2018).
- 885 37. Ganguly, K. & Poo, M. M. Activity-dependent neural plasticity from bench to bedside.  
886 *Neuron* vol. 80 729–741 (2013).
- 887 38. Vértes, P. E., Alexander-Bloch, A. & Bullmore, E. T. Generative models of rich clubs in  
888 hebbian neuronal networks and large-scale human brain networks. *Philos. Trans. R.*  
889 *Soc. B Biol. Sci.* **369**, (2014).
- 890 39. Ellis, B. J., Bianchi, J. M., Giskevicius, V. & Frankenhuis, W. E. Beyond Risk and  
891 Protective Factors: An Adaptation-Based Approach to Resilience. *Perspect. Psychol.*  
892 *Sci.* **12**, 561–587 (2017).
- 893 40. Frankenhuis, W. E. & Amir, D. What is the expected human childhood? Insights from  
894 evolutionary anthropology. *Dev. Psychopathol.* (2021)  
895 doi:10.1017/S0954579421001401.
- 896 41. Davis, E. P. *et al.* Exposure to unpredictable maternal sensory signals influences

- 897 cognitive development across species. *Proc. Natl. Acad. Sci. U. S. A.* **114**, 10390–  
898 10395 (2017).
- 899 42. Hiesinger, P. R. & Hassan, B. A. The Evolution of Variability and Robustness in Neural  
900 Development. *Trends Neurosci.* **41**, 577–586 (2018).
- 901 43. Vértes, P. E. & Bullmore, E. T. Annual research review: Growth connectomics--the  
902 organization and reorganization of brain networks during normal and abnormal  
903 development. *J. Child Psychol. Psychiatry.* **56**, 299–320 (2015).
- 904 44. Song, H. F., Kennedy, H. & Wang, X. J. Spatial embedding of structural similarity in the  
905 cerebral cortex. *Proc. Natl. Acad. Sci. U. S. A.* **111**, 16580–16585 (2014).
- 906 45. Pathak, A., Chatterjee, N. & Sinha, S. Developmental trajectory of *Caenorhabditis*  
907 *elegans* nervous system governs its structural organization. *PLoS Comput. Biol.* **16**,  
908 e1007602 (2020).
- 909 46. Ratering, D., Baltes, C., Nordmeyer-Massner, J., Marek, D. & Rudin, M. Performance  
910 of a 200-MHz cryogenic RF probe designed for MRI and MRS of the murine brain.  
911 *Magn. Reson. Med.* **59**, 1440–1447 (2008).
- 912 47. Wu, D. *et al.* In vivo high-resolution diffusion tensor imaging of the mouse brain.  
913 *Neuroimage* **83**, 18–26 (2013).
- 914 48. Arefin, T., Lee, C., White, J., Zhang, J. & Kaffman, A. Macroscopic Structural and  
915 Connectome Mapping of the Mouse Brain Using Diffusion Magnetic Resonance  
916 Imaging. *BIO-PROTOCOL* **11**, (2021).
- 917 49. Tournier, J. D. *et al.* MRtrix3: A fast, flexible and open software framework for  
918 medical image processing and visualisation. *Neuroimage* **202**, (2019).
- 919 50. Veraart, J. *et al.* Denoising of diffusion MRI using random matrix theory. *Neuroimage*  
920 **142**, 394 (2016).
- 921 51. Kellner, E., Dhital, B., Kiselev, V. G. & Reiser, M. Gibbs-ringing artifact removal based  
922 on local subvoxel-shifts. *Magn. Reson. Med.* **76**, 1574–1581 (2016).
- 923 52. Andersson, J. L. R. & Sotiropoulos, S. N. An integrated approach to correction for off-  
924 resonance effects and subject movement in diffusion MR imaging. *Neuroimage* **125**,  
925 1063–1078 (2016).
- 926 53. Tustison, N. J. *et al.* N4ITK: Improved N3 bias correction. *IEEE Trans. Med. Imaging* **29**,  
927 1310–1320 (2010).
- 928 54. Dhollander, T., Raffelt, D. & Connelly, A. Unsupervised 3-tissue response function  
929 estimation from single-shell or multi-shell diffusion MR data without a co-registered  
930 T1 image. in *ISMRM Workshop on Breaking the Barriers of Diffusion MRI* 5.
- 931 55. Jeurissen, B., Tournier, J. D., Dhollander, T., Connelly, A. & Sijbers, J. Multi-tissue  
932 constrained spherical deconvolution for improved analysis of multi-shell diffusion  
933 MRI data. *Neuroimage* **103**, 411–426 (2014).
- 934 56. Tournier, J.-D., Calamante, F. & Connelly, A. Improved probabilistic streamlines  
935 tractography by 2nd order integration over fibre orientation distributions. in  
936 *Proceedings of the International Society for Magnetic Resonance in Medicine* 1670  
937 (2010).
- 938 57. Chen, H. *et al.* Optimization of Large-scale Mouse Brain Connectome via Joint  
939 Evaluation of DTI and Neuron Tracing Data. *Neuroimage* **115**, 202 (2015).
- 940 58. Wang, N. *et al.* Variability and heritability of mouse brain structure: Microscopic MRI  
941 atlases and connectomes for diverse strains. *Neuroimage* **222**, 117274 (2020).
- 942 59. Avants, B. B. *et al.* A reproducible evaluation of ANTs similarity metric performance in  
943 brain image registration. *Neuroimage* **54**, 2033–2044 (2011).

- 944 60. Zalesky, A. *et al.* Connectome sensitivity or specificity: which is more important?  
945 *Neuroimage* **142**, 407–420 (2016).
- 946 61. Humphries, M. D., Gurney, K. & Prescott, T. J. The brainstem reticular formation is a  
947 small-world, not scale-free, network. *Proceedings. Biol. Sci.* **273**, 503–511 (2006).
- 948 62. Wold, H. Partial Least Squares. *Encycl. Stat. Sci.* (2004)  
949 doi:10.1002/0471667196.ESS1914.
- 950  
951  
952  
953  
954  
955  
956  
957  
958  
959  
960  
961  
962  
963  
964  
965  
966  
967  
968  
969  
970  
971  
972  
973  
974  
975  
976  
977  
978  
979  
980  
981  
982  
983  
984  
985  
986  
987  
988  
989

990 **Table S1. Comparisons of the global topology of the empirical connectomes.** See Methods  
 991 for details on the computation of the connectomic measures.  
 992

| Measure                   | UPS<br><i>M (SD)</i> | Control<br><i>M (SD)</i> | Test statistic*   | <i>p</i> |
|---------------------------|----------------------|--------------------------|-------------------|----------|
| Edge count                | 296.875 (10.250)     | 297.320 (11.943)         | $F_{1,47} = 0.02$ | 0.89     |
| Long-distance connections | 20.583 (6.199)       | 19.360 (6.945)           | $D_{1,47} = 0.42$ | 0.52     |
| Maximum modularity        | 0.591 (0.025)        | 0.589 (0.022)            | $F_{1,47} = 0.13$ | 0.72     |
| System segregation        | 0.593 (0.177)        | 0.496 (0.403)            | $D_{1,47} = 0.26$ | 0.32     |
| Global efficiency         | 0.240 (0.015)        | 0.240 (0.013)            | $D_{1,47} = 0.19$ | 0.71     |
| Small-worldness           | 4.200 (0.395)        | 4.112 (0.445)            | $F_{1,47} = 0.54$ | 0.47     |

\* A Shapiro test was applied to test the normality of the distributions. Normal distributions were compared using ANOVA, while others were compared using a KS test.  
 Note. "UPS" = unpredictable postnatal stress.

993  
 994  
 995  
 996  
 997  
 998  
 999  
 1000  
 1001  
 1002  
 1003  
 1004  
 1005  
 1006  
 1007  
 1008  
 1009  
 1010  
 1011  
 1012  
 1013  
 1014  
 1015  
 1016  
 1017  
 1018  
 1019  
 1020

1021 **Table S2. Comparisons of the local topology of the empirical connectomes.** Distributions of  
1022 local characteristics, taken as the group average for each node, were compared between  
1023 UPS and control conditions using Kolmogorov-Smirnov (KS) tests. See Methods for details on  
1024 the computation of the connectomic measures.

1025

| Measure                           | UPS<br><i>M (SD)</i> | Control<br><i>M (SD)</i> | <i>D</i> statistic | <i>p</i> |
|-----------------------------------|----------------------|--------------------------|--------------------|----------|
| <b>Node degree</b>                | 1.292 (0.859)        | 1.200 (0.913)            | 0.046              | 1.00     |
| <b>Betweenness<br/>centrality</b> | 2.476 (4.959)        | 1.204 (4.670)            | 0.054              | 0.99     |
| <b>Clustering<br/>coefficient</b> | 0.236 (0.423)        | 0.320 (0.456)            | 0.062              | 0.96     |
| <b>Edge length</b>                | 29.743 (19.116)      | 28.159 (21.694)          | 0.039              | 1.00     |
| <b>Mean matching<br/>index</b>    | 0.022 (0.017)        | 0.019 (0.016)            | 0.062              | 0.96     |
| <b>Nodal efficiency</b>           | 0.243 (0.431)        | 0.327 (0.463)            | 0.062              | 0.96     |

*Note.* “UPS” = unpredictable postnatal stress.

1026

1027

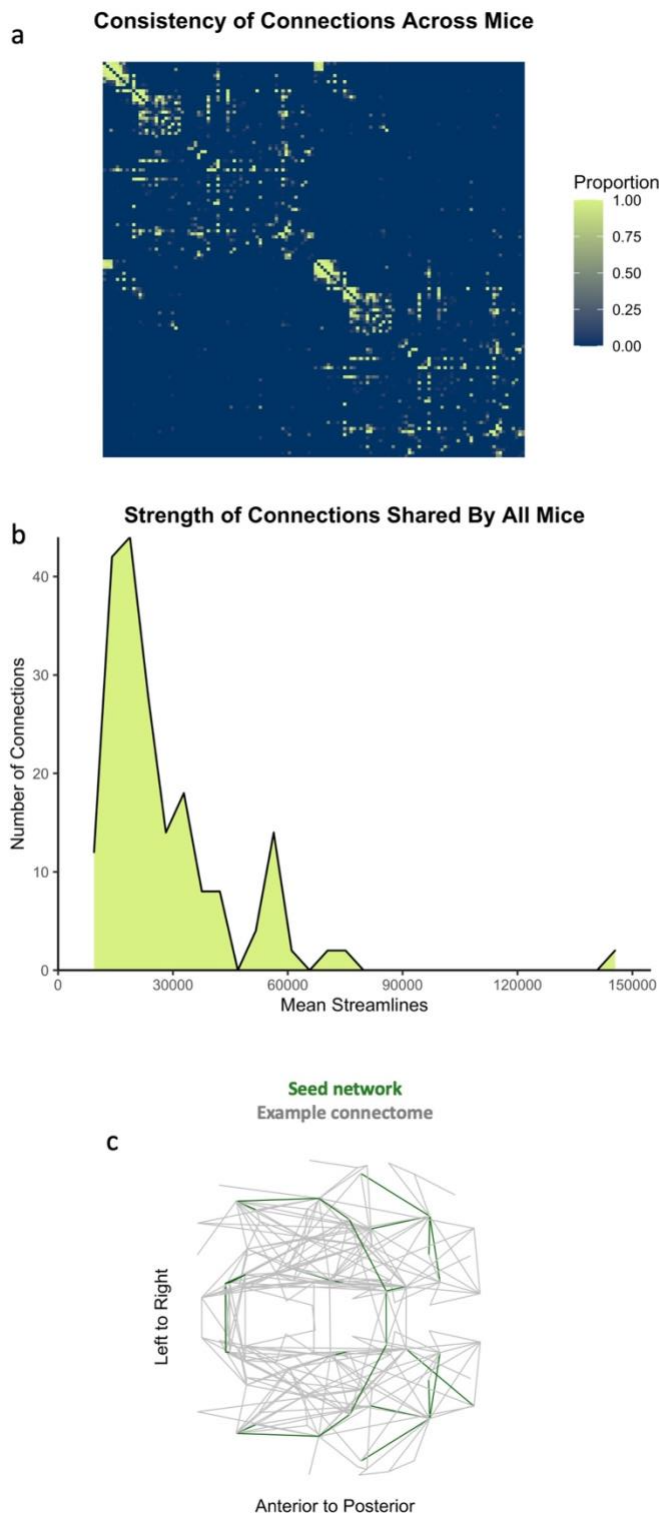

1028  
1029 **Figure S1. Seed network used for generative modelling.** (a) An adjacency matrix of the 130  
1030 regions of the parcellation. The colour indicates the proportion of the sample whose  
1031 connectomes contain each connection, ranging from 0 (blue) to 1 (green). (b) The sample  
1032 mean of the weight of connections shared by all empirical connectomes. (c) A schematic  
1033 representation of the seed network (green) superimposed over a representative empirical  
1034 connectome (grey).



1035 **Table S3. Energy, optimal parameters, and topological dissimilarity for each generative**  
 1036 **rule.** Lowest-energy networks for each animal (N = 49) were obtained by comparing 160,000  
 1037 combinations of parameters in the space defined by  $-10 \leq \eta \leq 0$  and  $0 \leq \gamma \leq 10$ .  
 1038

| Generative Model | Energy |        | Eta ( $\eta$ ) |         | Gamma ( $\gamma$ ) |        |
|------------------|--------|--------|----------------|---------|--------------------|--------|
|                  | Mean   | CV     | Mean           | CV      | Mean               | CV     |
| <b>Spatial</b>   | 0.309  | 6.848  | -4.185         | -12.314 | 5.120              | 52.631 |
| <b>Neighbour</b> | 0.103  | 12.562 | -2.667         | -9.817  | 0.360              | 8.488  |
| <b>Match</b>     | 0.110  | 11.276 | -2.624         | -9.842  | 0.402              | 11.236 |
| <b>C-Avg</b>     | 0.170  | 11.972 | -7.301         | -13.144 | 2.361              | 34.19  |
| <b>C-Min</b>     | 0.214  | 8.094  | -5.586         | -22.763 | 0.546              | 22.261 |
| <b>C-Max</b>     | 0.178  | 12.184 | -8.36          | -15.669 | 4.946              | 52.494 |
| <b>C-Diff</b>    | 0.207  | 10.056 | -6.166         | -8.732  | 0.880              | 24.858 |
| <b>C-Prod</b>    | 0.215  | 8.176  | -5.686         | -14.933 | 0.569              | 15.848 |
| <b>D-Avg</b>     | 0.098  | 9.357  | -4.787         | -13.923 | 2.596              | 12.808 |
| <b>D-Min</b>     | 0.157  | 9.426  | -5.116         | -11.233 | 0.435              | 13.393 |
| <b>D-Max</b>     | 0.092  | 8.806  | -4.968         | -15.855 | 2.732              | 15.693 |
| <b>D-Diff</b>    | 0.132  | 10.305 | -5.514         | -25.623 | 2.507              | 21.68  |
| <b>D-Prod</b>    | 0.155  | 8.889  | -5.000         | -11.119 | 0.379              | 14.452 |

1039  
 1040 *Note.* “ $\Delta TF$ ” = topological fingerprint dissimilarity, : “Neighbour” = Number of Shared  
 1041 Neighbours, “Match” = Matching Index, “C-Avg” = Average Clustering, “C-Min” = Minimum  
 1042 Clustering, “C-Max” = Maximum Clustering, “C-Diff” = Difference in Clustering, “C-Prod” =  
 1043 Product of Clustering, “D-Avg” = Average Degree, “D-Min” = Minimum Degree, “D-Max” =  
 1044 Maximum Degree, “D-Diff” = Difference in Degree, “D-Prod” = Product of Degree.

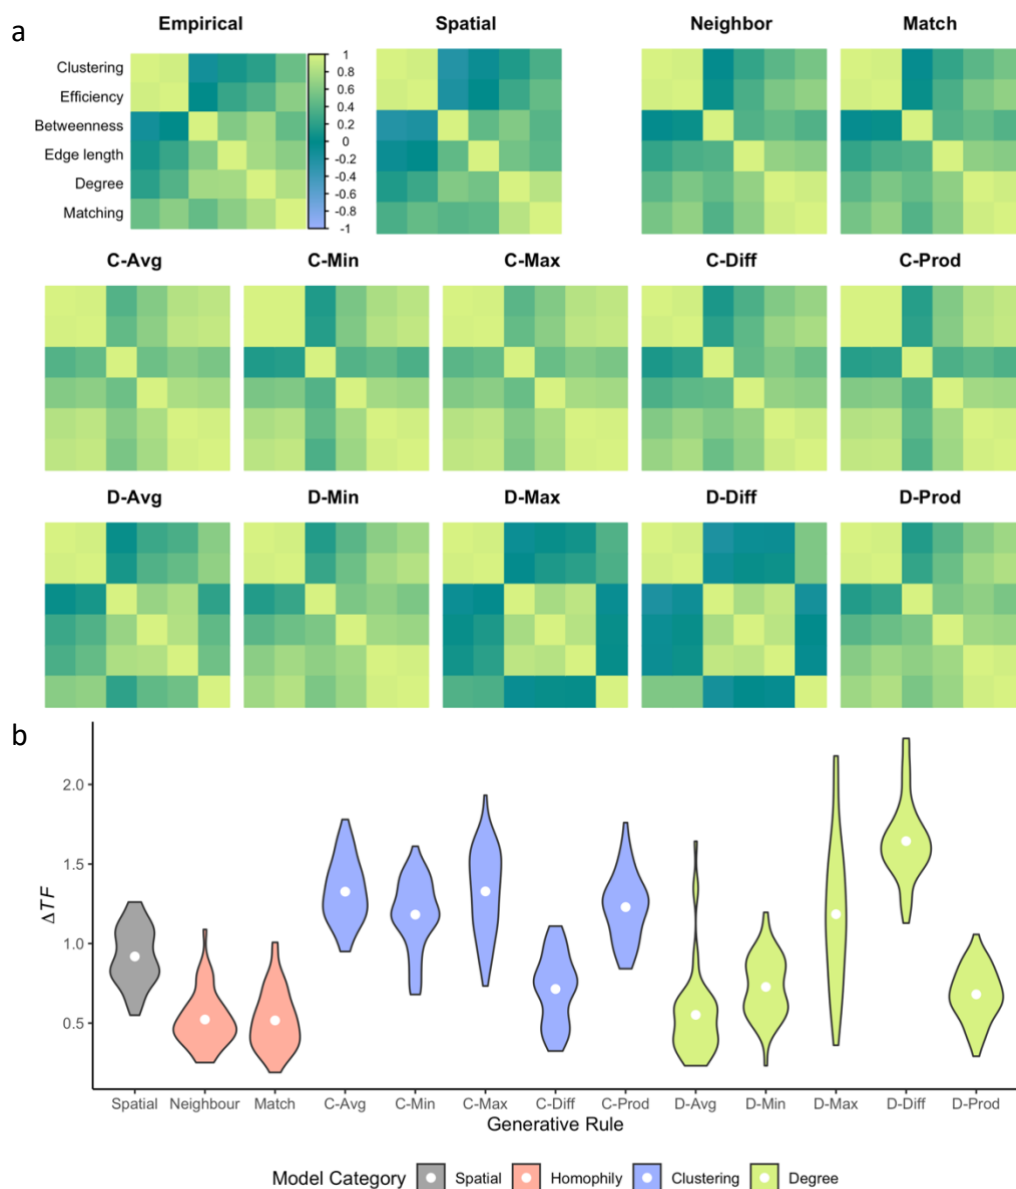

1045  
1046  
1047  
1048  
1049  
1050  
1051  
1052  
1053  
1054  
1055  
1056  
1057  
1058  
1059  
1060

**Figure S2. Topological fingerprint matrices and topological dissimilarity for all generative models. (a)** The topological fingerprint is a correlation matrix of local network statistics, including node degree, clustering coefficient, betweenness centrality, total edge length, local efficiency and matching index. Across all matrices, the value of the correlation can be inferred from the colour bar, which spans -1 (lilac) to 1 (spring green). Correlations shown are the sample average (N = 49). For ease of visualisation, the measures are arranged according to the hierarchical clustering of measures in the empirical networks. **(c)** The neighbour model achieves lowest  $\Delta TF$ , a measure of discrepancy between synthetic and empirical patterns of connectivity. White points indicate the sample mean (N = 49). *Note:* “Neighbour” = Number of Shared Neighbours, “Match” = Matching Index, “C-Avg” = Average Clustering Coefficient, “C-Min” = Minimum Clustering Coefficient, “C-Max” = Maximum Clustering Coefficient, “C-Diff” = Difference in Clustering Coefficient, “C-Prod” = Product of Clustering Coefficient, “D-Avg” = Average Degree, “D-Min” = Minimum Degree, “D-Max” = Maximum Degree, “D-Diff” = Difference in Degree, “D-Prod” = Product of Degree.

1061 **Table S4. Error across topological measures and nodes.** For each measure, the error  
 1062 quantifies the discrepancy observed between synthetic and empirical networks, while the  
 1063 absolute error is calculated as the sum of the Z-scores of all six errors. For details about each  
 1064 region, see [1].  
 1065

| Node       | Degree Error | Clustering Error | Betweenness Error | Edge Length Error | Efficiency Error | Matching Index Error | Absolute Error |
|------------|--------------|------------------|-------------------|-------------------|------------------|----------------------|----------------|
| L-AMd      | -0.22        | 0.14             | -37.18            | -3.42             | 0.12             | 0.01                 | 1.42           |
| L-SSp-m2/3 | -0.53        | 0.24             | 25.21             | -2.46             | 0.22             | 0.01                 | 2.13           |
| L-AUDd6a   | -8.98        | -0.44            | -290.73           | -158.46           | -0.59            | -0.05                | 12.88          |
| L-SSp-n4   | 1.02         | 0.48             | -95.17            | 15.35             | 0.54             | 0.03                 | 5.88           |
| L-ml       | -3.63        | -0.34            | -64.12            | -73.31            | -0.41            | -0.03                | 7.08           |
| L-AOBmi    | -1.92        | 0.06             | 69.14             | -43.88            | 0.01             | -0.02                | 2.67           |
| L-TEa1     | -1.82        | -0.22            | 25.6              | -28.2             | -0.28            | -0.01                | 3.66           |
| L-COAp1-3  | 5.88         | 0.14             | 534.87            | 114.14            | 0.24             | 0.05                 | 8.59           |
| L-PVHpml   | 4.31         | -0.2             | 811.1             | 48.52             | -0.23            | 0.01                 | 6.08           |
| L-CUL4gr   | 5.55         | -0.18            | 794.87            | 89.17             | -0.08            | 0.03                 | 7.63           |
| L-oct      | -2.37        | 0.11             | -273.33           | -46.5             | 0.04             | 0                    | 3.16           |
| L-VM       | 1.82         | 0.17             | 102.94            | 40.52             | 0.23             | 0.04                 | 4.52           |
| L-FLmo     | -1.02        | -0.16            | -91.14            | -29.43            | -0.17            | 0                    | 2.83           |
| L-VISal6a  | -1.04        | -0.08            | -66.69            | -26.06            | -0.1             | 0                    | 2.18           |
| L-SCdw     | -1.02        | -0.11            | -58.99            | -15.86            | -0.13            | 0.01                 | 1.8            |
| L-RSPagl6a | -1.9         | -0.21            | -71.33            | -31.42            | -0.23            | -0.01                | 3.95           |
| L-TR2      | 3.16         | 0.01             | 508.69            | 39.5              | 0.01             | 0                    | 3.17           |
| L-FLgr     | 0.37         | 0.22             | -52.4             | -7.48             | 0.21             | 0.03                 | 2.96           |
| L-MPT      | -1.86        | 0.07             | -80.9             | -41.92            | 0.07             | 0.01                 | 2.19           |
| L-DR       | 0.29         | 0.2              | -29.77            | 5.42              | 0.19             | 0.02                 | 2.6            |
| L-AHNp     | -6.35        | 0.08             | -171.14           | -120.83           | -0.01            | -0.04                | 7.16           |
| L-lotd     | -2.45        | -0.2             | -69.24            | -50.25            | -0.25            | -0.02                | 4.8            |
| L-EPd      | -0.47        | 0.11             | -141.54           | 2.34              | 0.1              | 0.02                 | 2.09           |
| L-MPNm     | -2.41        | -0.29            | -59.58            | -45.5             | -0.34            | -0.02                | 5.32           |
| L-INC      | -1.39        | 0.15             | -278.04           | -40.17            | 0.16             | 0.02                 | 3.76           |
| L-ECT6a    | -3.94        | -0.26            | 73.67             | -79.93            | -0.34            | -0.03                | 6.54           |
| L-CENT3gr  | 2.84         | 0.12             | -39.92            | 58.21             | 0.22             | 0.04                 | 4.93           |
| L-cbt      | -1.78        | -0.2             | -102.34           | -23.13            | -0.23            | 0                    | 3.3            |
| L-ORB1     | -10.43       | -0.56            | -257.05           | -128.4            | -0.72            | -0.07                | 14.55          |
| L-AHNa     | 6.22         | -0.1             | 443.37            | 20.88             | -0.04            | 0.02                 | 4.28           |
| L-HPF      | -1.51        | 0.18             | -161.84           | -19.69            | 0.2              | 0.01                 | 2.79           |
| L-VAL      | -0.96        | 0.1              | -78.24            | -30.29            | 0.06             | 0.01                 | 2.12           |
| L-COAa     | 6.1          | -0.18            | 432.69            | 74.68             | -0.08            | 0.03                 | 6.29           |
| L-PARN     | -6.63        | -0.43            | -265.15           | -88.95            | -0.54            | -0.04                | 10.08          |
| L-NOD      | -2.76        | 0.28             | -272.64           | -55.55            | 0.21             | -0.01                | 5.25           |
| L-RSPd     | -0.47        | -0.29            | 319.89            | -44.03            | -0.36            | -0.02                | 5.41           |
| L-arb      | -1.27        | -0.15            | -102.79           | -17.8             | -0.19            | -0.01                | 2.88           |
| L-IV       | -1.39        | 0.24             | -76.28            | -22.73            | 0.2              | 0                    | 2.98           |
| L-AUDv     | -1.96        | -0.09            | -113.77           | -26.3             | -0.13            | -0.01                | 2.81           |
| L-TTd1-4   | -3.82        | -0.49            | -138.03           | -11.91            | -0.53            | -0.03                | 7.21           |

|              |       |       |         |        |       |       |       |
|--------------|-------|-------|---------|--------|-------|-------|-------|
| L-KF         | -0.98 | 0.24  | -84.92  | -13.53 | 0.22  | 0     | 2.8   |
| L-DORpm      | 0.53  | 0.03  | -38.73  | 4.92   | 0.01  | 0     | 0.76  |
| L-lab        | 1.53  | -0.02 | -9.48   | 21.55  | -0.04 | 0.01  | 1.49  |
| L-ptf        | -4.16 | -0.16 | -206.16 | -49.74 | -0.25 | -0.03 | 5.87  |
| L-ttp        | 0.51  | -0.03 | 174.81  | -6.98  | -0.07 | 0.01  | 1.12  |
| L-grv of CBX | -0.98 | 0.44  | -233.56 | -10.88 | 0.42  | 0.01  | 4.78  |
| L-VISpl6a    | 3.47  | 0.11  | -116.26 | 33.41  | 0.22  | 0.03  | 4.3   |
| L-SSp-un     | 1.86  | 0.3   | 69.48   | 22.8   | 0.36  | 0.04  | 4.92  |
| L-PBme       | 7.71  | 0.05  | 430.47  | 27.26  | 0.19  | 0.03  | 5.84  |
| L-MH         | 0.9   | 0.15  | -53.74  | -1.25  | 0.16  | 0.01  | 1.85  |
| L-IXn        | -1.39 | 0.38  | -240.49 | -30.09 | 0.35  | 0.02  | 5.07  |
| L-VISpm4     | 3.57  | 0.22  | -10.2   | 6.38   | 0.34  | 0.04  | 4.71  |
| L-cbp        | 4.08  | -0.02 | -2.32   | -2.05  | 0.09  | 0.03  | 2.68  |
| L-GU1        | 6.22  | -0.17 | 1230.54 | 4.3    | -0.08 | 0.04  | 7.39  |
| L-MSC        | -2.84 | 0.38  | -486.32 | -53.82 | 0.29  | 0.01  | 5.98  |
| L-ORBm2/3    | 10.69 | -0.11 | 1647.14 | 75.78  | 0.02  | 0.04  | 11.06 |
| L-SSp-bfd1   | -5.67 | -0.47 | -335.72 | -88.6  | -0.59 | -0.03 | 9.97  |
| L-DMHv       | -3    | 0.37  | -273.4  | -43.09 | 0.34  | 0     | 5.55  |
| L-DECgr      | 1.37  | 0.18  | -273.17 | 15.76  | 0.25  | 0.03  | 4.13  |
| L-CU         | -1.18 | 0.27  | -256.02 | -30.5  | 0.3   | 0     | 4.04  |
| L-CA1sp      | 6.49  | 0.01  | 8.04    | 105.77 | 0.19  | 0.03  | 5.82  |
| L-MO6a       | -0.8  | 0.33  | -221.42 | -28.66 | 0.29  | 0.01  | 3.96  |
| L-VISam5     | 2.55  | 0.02  | -45.18  | 37.45  | 0.08  | 0.01  | 2.34  |
| L-CBXmo      | 0.84  | 0     | -95.62  | -19.04 | 0.03  | 0     | 1.1   |
| L-PB         | 2.18  | -0.09 | 21.42   | 0.51   | -0.03 | 0.01  | 1.45  |
| R-AMd        | 0.04  | 0.19  | -151.96 | 7.23   | 0.18  | 0.01  | 2.53  |
| R-SSp-m2/3   | -0.9  | 0.1   | -70.07  | 18.86  | 0.11  | 0.01  | 1.84  |
| R-AUDd6a     | -7.88 | -0.34 | -263.05 | -51.13 | -0.49 | -0.04 | 9.16  |
| R-SSp-n4     | 1.53  | 0.48  | -67.28  | 40.02  | 0.55  | 0.03  | 6.65  |
| R-ml         | -2.02 | -0.21 | -39.71  | -24.91 | -0.25 | -0.01 | 3.85  |
| R-AOBmi      | -0.39 | -0.02 | 185.84  | 7.38   | -0.05 | 0     | 1.29  |
| R-TEa1       | -0.71 | -0.19 | 134.37  | 15.07  | -0.22 | 0     | 2.69  |
| R-COApml-3   | 6.49  | 0.12  | 709.64  | 116.99 | 0.25  | 0.05  | 9.21  |
| R-PVHpmi     | 4.41  | -0.19 | 869.81  | 58.39  | -0.2  | 0.01  | 6.39  |
| R-CUL4gr     | 6.69  | -0.14 | 891.72  | 115.2  | -0.03 | 0.04  | 8.68  |
| R-oct        | -2.55 | 0.01  | -206.9  | -38    | -0.05 | 0     | 2.49  |
| R-VM         | 3.31  | 0.21  | 201.61  | 75.8   | 0.31  | 0.05  | 6.72  |
| R-FLmo       | -0.8  | 0     | -112.73 | -21.4  | -0.01 | 0     | 1.29  |
| R-VISal6a    | -1.45 | -0.09 | -180.1  | -24.03 | -0.12 | -0.01 | 2.79  |
| R-SCdw       | -2.06 | -0.19 | -89.53  | -24.39 | -0.23 | 0     | 3.24  |
| R-RSPagl6a   | -1.61 | -0.11 | -92.3   | -19.35 | -0.12 | -0.01 | 2.71  |
| R-TR2        | 3.53  | 0.03  | 481.93  | 28.71  | 0.05  | 0.01  | 3.24  |
| R-FLgr       | 0.2   | 0.3   | -24.57  | 1.81   | 0.29  | 0.02  | 3.28  |
| R-MPT        | -2.22 | 0     | -158.84 | -28.32 | -0.02 | 0     | 1.88  |
| R-DR         | -0.2  | 0.14  | -21.66  | -5.26  | 0.12  | 0.02  | 1.89  |
| R-AHNp       | -6.29 | -0.19 | -94.75  | -50.31 | -0.28 | -0.04 | 6.96  |
| R-lotd       | -1.08 | -0.09 | -36.35  | -13.27 | -0.1  | -0.01 | 1.97  |
| R-EPd        | -1.16 | 0.13  | -105.45 | -0.28  | 0.09  | 0.02  | 2.14  |

|                     |       |       |         |        |       |       |      |
|---------------------|-------|-------|---------|--------|-------|-------|------|
| <b>R-MPNm</b>       | -1.94 | -0.25 | -127.77 | -27.65 | -0.29 | -0.02 | 4.52 |
| <b>R-INC</b>        | 0.04  | 0.11  | -102.35 | -16.94 | 0.15  | 0.02  | 2.46 |
| <b>R-ECT6a</b>      | -2.49 | -0.15 | 25.07   | -25.98 | -0.2  | -0.02 | 3.65 |
| <b>R-CENT3gr</b>    | 3.63  | 0.15  | -157.78 | 100.04 | 0.26  | 0.05  | 6.88 |
| <b>R-cbt</b>        | -1.67 | -0.24 | -91.47  | -10.9  | -0.26 | 0     | 3.33 |
| <b>R-ORB1</b>       | -9.71 | -0.52 | -325.37 | -41.31 | -0.66 | -0.07 | 12   |
| <b>R-AHNa</b>       | 7.41  | -0.17 | 733.8   | 39.9   | -0.13 | 0.01  | 6.35 |
| <b>R-HPF</b>        | -1.76 | 0.23  | -220.68 | -24.71 | 0.25  | 0.01  | 3.53 |
| <b>R-VAL</b>        | -1.31 | 0.04  | -80.58  | -28.72 | 0.01  | 0.01  | 1.74 |
| <b>R-COaA</b>       | 5.84  | -0.07 | 201.38  | 78.08  | 0.04  | 0.03  | 5.12 |
| <b>R-PARN</b>       | -7.02 | -0.46 | -192.47 | -14.42 | -0.59 | -0.04 | 8.73 |
| <b>R-NOD</b>        | -2.49 | 0.22  | -249.33 | -11.57 | 0.15  | -0.01 | 3.56 |
| <b>R-RSPd</b>       | 0.08  | -0.34 | 331.05  | 6.02   | -0.38 | -0.01 | 4.73 |
| <b>R-arb</b>        | -1.67 | -0.31 | -56.07  | -12.93 | -0.35 | -0.01 | 4.17 |
| <b>R-IV</b>         | -2.41 | -0.06 | -42.26  | -25.36 | -0.11 | 0     | 2.31 |
| <b>R-AUDv</b>       | -2.39 | -0.18 | -168.6  | -21.52 | -0.21 | -0.01 | 3.72 |
| <b>R-TTd1-4</b>     | -4.2  | -0.44 | -154.67 | -10.37 | -0.5  | -0.03 | 7.03 |
| <b>R-KF</b>         | -0.98 | 0.12  | -141.8  | -1.91  | 0.1   | 0     | 1.67 |
| <b>R-DORpm</b>      | 1.24  | 0.06  | 23.94   | 47.52  | 0.08  | 0.01  | 2.08 |
| <b>R-lab</b>        | 2.71  | -0.01 | 148.17  | 42.77  | -0.02 | 0.02  | 2.73 |
| <b>R-ptf</b>        | -3.63 | -0.17 | -42.75  | 0.12   | -0.23 | -0.02 | 3.93 |
| <b>R-ttp</b>        | 1.18  | 0.11  | 40      | 32.74  | 0.13  | 0.02  | 2.45 |
| <b>R-grv of CBX</b> | -1.06 | 0.57  | -248.01 | 4.01   | 0.55  | 0.02  | 6.06 |
| <b>R-VISpl6a</b>    | 4.47  | 0.16  | -15.31  | 52.98  | 0.31  | 0.03  | 5.46 |
| <b>R-SSp-un</b>     | 2.24  | 0.36  | 48.94   | 26.03  | 0.44  | 0.04  | 5.79 |
| <b>R-PBme</b>       | 8.33  | 0     | 474.66  | 56.07  | 0.15  | 0.04  | 6.49 |
| <b>R-MH</b>         | 0.59  | 0.12  | -63.39  | 3.49   | 0.13  | 0.01  | 1.66 |
| <b>R-IXn</b>        | 0.02  | 0.49  | -148.9  | -10.61 | 0.47  | 0.03  | 5.27 |
| <b>R-VISpm4</b>     | 3.96  | 0.28  | -49.44  | 41.2   | 0.4   | 0.04  | 6.34 |
| <b>R-cbp</b>        | 3.43  | -0.01 | -61.8   | 13.9   | 0.08  | 0.03  | 2.99 |
| <b>R-GU1</b>        | 6.88  | -0.15 | 1466.97 | 3.95   | -0.07 | 0.04  | 8.24 |
| <b>R-MSC</b>        | -2.41 | 0.34  | -328.9  | -25.66 | 0.25  | 0.01  | 4.6  |
| <b>R-ORBm2/3</b>    | 8.88  | -0.27 | 1455.35 | 13.67  | -0.18 | 0.03  | 9.4  |
| <b>R-SSp-bfd1</b>   | -6.88 | -0.44 | -343.83 | -54.41 | -0.59 | -0.03 | 9.49 |
| <b>R-DMHv</b>       | -3.41 | 0.27  | -344.47 | 9.02   | 0.24  | 0     | 4.42 |
| <b>R-DECgr</b>      | 1.61  | 0.07  | -88.32  | 37.7   | 0.15  | 0.03  | 3.32 |
| <b>R-CU</b>         | -1.43 | 0.21  | -264.79 | 27.95  | 0.23  | 0     | 3.67 |
| <b>R-CA1sp</b>      | 6.02  | -0.06 | 87.33   | 103.27 | 0.09  | 0.03  | 5.54 |
| <b>R-MO6a</b>       | -2.41 | 0.3   | -321.76 | 10.68  | 0.25  | 0     | 4.3  |
| <b>R-VISam5</b>     | 0.71  | -0.02 | -72.09  | 0      | -0.01 | 0     | 0.75 |
| <b>R-CBXmo</b>      | 0.24  | 0     | -54.21  | 0      | 0.02  | 0     | 0.59 |
| <b>R-PB</b>         | 2.06  | -0.06 | -46.92  | 0      | -0.01 | 0.01  | 1.32 |

1066

1067 [1] Wiring cost and topological participation of the mouse brain connectome.

1068 Mikail Rubinov, Rolf J. F. Ypma, Charles Watson, Edward T. Bullmore.

1069 Proceedings of the National Academy of Sciences Aug 2015, 112 (32) 10032-

1070 10037; DOI: 10.1073/pnas.1420315112.

1071

1072 **Table S5. Correlations between error in spatial embedding and seed network**  
1073 **characteristics.** The error in spatial embedding quantifies the discrepancy between the  
1074 synthetic and empirical connectomes on one of six nodal characteristics: node degree,  
1075 clustering coefficient, betweenness centrality, edge length, nodal efficiency, and matching  
1076 index. For each characteristic, Pearson correlation coefficients were calculated between its  
1077 value in the seed network and the mean spatial error across the sample.

1078  
1079

| <b>Nodal characteristic</b> | <b>Correlation coefficient</b> | <b><i>p</i> value</b>     |
|-----------------------------|--------------------------------|---------------------------|
| <b>Degree</b>               | 0.4356                         | 2.221 x 10 <sup>-7*</sup> |
| <b>Clustering</b>           | -0.0104                        | 0.9067                    |
| <b>Betweenness</b>          | 0.1167                         | 0.1862                    |
| <b>Edge length</b>          | 0.1912                         | 0.0293                    |
| <b>Efficiency</b>           | 0.0026                         | 0.9767                    |
| <b>Matching</b>             | 0.0822                         | 0.3523                    |

\* Correlation is significant at Bonferroni corrected  $p < 0.00833$

1080
